1 **Cell-intrinsic activation of Orai1 regulates human T cell motility**

2

3 Tobias X. Dong<sup>1</sup>, Milton L. Greenberg<sup>1</sup>, Sabrina Leverrier<sup>1</sup>, Ying Yu<sup>1</sup>, Ian Parker<sup>1,2</sup>,

4 Joseph L. Dynes<sup>1</sup>, and Michael D. Cahalan<sup>1,3</sup>

5 <sup>1</sup>Department of Physiology and Biophysics, University of California, 285 Irvine Hall,

6 Irvine, California 92697, USA.

7 <sup>2</sup>Department of Neurobiology & Behavior, University of California, McGaugh Hall, Irvine,

8 California 92697, USA.

9 <sup>3</sup>Institute for Immunology, University of California, 285 Irvine Hall, Irvine, California

10 92697, USA.

11 \*Corresponding Author: Michael D. Cahalan ([mcahalan@uci.edu](mailto:mcahalan@uci.edu))

12 Key Words: T cell motility, Orai1, genetically encoded Ca<sup>2+</sup> indicator, Ca<sup>2+</sup> signaling,

13 two-photon microscopy

14

15 **Abstract**

16 Ca<sup>2+</sup> signaling through the store-operated Ca<sup>2+</sup> channel, Orai1, is crucial for T cell  
17 function, but a role in regulating T cell motility in lymph nodes has not been previously  
18 reported. Tracking human T cells in immunodeficient mouse lymph nodes and in  
19 microfabricated PDMS channels, we show that inhibition of Orai1 channel activity with a  
20 dominant-negative Orai1-E106A construct increases average T cell velocities by reducing  
21 the frequency of pauses in motile T cells. Orai1-dependent motility arrest occurs  
22 spontaneously during confined motility *in vitro*, even in the absence of extrinsic cell  
23 contacts or antigen recognition. Utilizing a novel ratiometric genetically encoded cytosolic  
24 Ca<sup>2+</sup> indicator, Salsa6f, we show these spontaneous pauses during T cell motility *in vitro*  
25 coincide with episodes of spontaneous cytosolic Ca<sup>2+</sup> signaling. Our results demonstrate  
26 that Orai1, activated in a cell-intrinsic manner, regulates T cell motility patterns that  
27 accompany immune surveillance.

28

29 To initiate the adaptive immune response, T cells must make direct contact with antigen-  
30 presenting cells (APCs) in the lymph node, enabling T cell receptors (TCRs) to engage  
31 peptide-bound MHC molecules presented on the APC surface. Because cognate  
32 antigens are rare for any given TCR, many APCs must be scanned to identify those  
33 bearing cognate antigens. Thus, optimizing T cell motility to balance search sensitivity  
34 and speed is crucial for efficient antigen search and proper immune function (Cahalan  
35 and Parker 2005, Krummel, Bartumeus et al. 2016). Both cell-intrinsic and environmental  
36 factors have been proposed to regulate T cell motility within lymph nodes and peripheral  
37 tissues (Miller, Wei et al. 2002, Bousso and Robey 2003, Mempel, Henrickson et al. 2004,  
38 Mrass, Petravic et al. 2010). T cell motility in lymph nodes, sometimes referred to as  
39 “basal motility”, has been likened to diffusive Brownian motion, resembling a “stop-and-  
40 go” random walk with an overall exploratory spread that results in a linear mean squared  
41 displacement over time (Miller, Wei et al. 2002). Subsequent studies defined a role of  
42 cellular cues in guiding T cell migration, such as contact with the lymph node stromal cell  
43 network or short-term encounters with resident dendritic cells (Miller, Hejazi et al. 2004,  
44 Bajenoff, Egen et al. 2006, Khan, Headley et al. 2011). Whereas the basic signaling  
45 mechanisms for cell-intrinsic induction of random motility have been previously explored  
46 in several cell types (Petrie, Doyle et al. 2009), it remains unclear if such mechanisms  
47 apply in T cells.

48 Upon T cell recognition of cognate antigen, TCR engagement results in an  
49 elevated cytosolic  $Ca^{2+}$  concentration that acts as a “STOP” signal to halt motility and  
50 anchor the T cell to the site of antigen presentation (Donnadieu, Bismuth et al. 1994,  
51 Negulescu, Krasieva et al. 1996, Dustin, Bromley et al. 1997, Bhakta, Oh et al. 2005,

52 Moreau, Lemaitre et al. 2015). The predominant mechanism for increasing cytosolic  $\text{Ca}^{2+}$   
53 in T cells is through store-operated  $\text{Ca}^{2+}$  entry (SOCE), which is mediated by the  
54 molecular components STIM1 and Orai1. TCR stimulation triggers depletion of  
55 intracellular  $\text{Ca}^{2+}$  stores in the endoplasmic reticulum (ER), resulting in translocation of  
56 the ER-resident  $\text{Ca}^{2+}$  sensor STIM1 to specialized ER-plasma membrane (PM) junctions  
57 where Orai1 channels aggregate into puncta and activate to allow sustained  $\text{Ca}^{2+}$  influx  
58 (Liou, Kim et al. 2005, Roos, DiGregorio et al. 2005, Zhang, Yu et al. 2005, Luik, Wu et  
59 al. 2006, Vig, Beck et al. 2006, Zhang SL 2006, Calloway, Vig et al. 2009, Wu, Covington  
60 et al. 2014). Orai1 channel activity is crucial for immune function, as human mutations in  
61 Orai1 result in severe combined immunodeficiency (SCID) (Feske, Gwack et al. 2006).  
62 Additional roles of Orai1 have been defined in chemotaxis to certain chemokines and T  
63 cell homing to lymph nodes (Greenberg, Yu et al. 2013); actin cytoskeleton  
64 rearrangement (Schaff, Dixit et al. 2010, Dixit, Yamayoshi et al. 2011, Babich and  
65 Burkhardt 2013); migration during shear flow (Schaff, Dixit et al. 2010, Dixit, Yamayoshi  
66 et al. 2011); lipid metabolism (Maus, Cuk et al. 2017); and dendritic spine maturation in  
67 neurons (Korkotian, Oni-Biton et al. 2017). However, despite their contributions to other  
68 aspects of T cell function, no role has been identified for Orai1 channels in T cell motility  
69 patterns underlying scanning behavior.

70  $\text{Ca}^{2+}$  imaging studies commonly rely on small synthetic  $\text{Ca}^{2+}$  indicators such as the  
71 ratiometric probe fura-2. However, synthetic indicators must be loaded into cells and  
72 cannot be targeted to subcellular compartments or specific cell populations. Furthermore,  
73 synthetic indicators slowly leak out of cells over time, and thus are unsuitable for long-  
74 term studies. To overcome these limitations, genetically encoded  $\text{Ca}^{2+}$  indicators (GECIs)

75 were first developed two decades ago as probes based on Förster Resonance Energy  
76 Transfer (FRET) (Miyawaki, Llopis et al. 1997, Romoser, Hinkle et al. 1997, Perez  
77 Koldenkova and Nagai 2013). Since then, GECIs have undergone remarkable  
78 improvements in variety and functionality, including the optimization of single fluorescent  
79 protein-based indicators such as the GCaMP and the GECO series (Nakai, Ohkura et al.  
80 2001, Zhao, Araki et al. 2011), as well as the new FRET-based TN indicators utilizing  
81 troponin C instead of calmodulin for the  $\text{Ca}^{2+}$  sensing element (Heim and Griesbeck 2004,  
82 Thestrup, Litzlbauer et al. 2014). Whereas single fluorescent protein-based indicators  
83 have high brightness and fast response kinetics, as non-ratiometric probes they are  
84 problematic for  $\text{Ca}^{2+}$  imaging in motile cells because fluorescence changes resulting from  
85 movement are indistinguishable from actual changes in  $\text{Ca}^{2+}$  levels. Here, we introduce  
86 a novel genetically encoded  $\text{Ca}^{2+}$  indicator, Salsa6f, consisting of GCaMP6f fused to  
87 tdTomato, providing high dynamic range and ratiometric capabilities.

88 In this study, we use human T cells to assess the role of Orai1 in cell motility.  
89 Expression of a dominant-negative Orai1-E106A construct was used to block Orai1  
90 channel activity both *in vivo* within immunodeficient mouse lymph nodes (Greenberg, Yu  
91 et al. 2013), and *in vitro* within microfabricated polydimethylsiloxane (PDMS) chambers  
92 (Jacobelli, Friedman et al. 2010). We then utilize our genetically encoded Salsa6f probe  
93 to monitor spontaneous  $\text{Ca}^{2+}$  signaling in confined microchannels *in vitro*. Our results  
94 indicate that  $\text{Ca}^{2+}$  influx through Orai1 channels, activated intermittently in a cell-intrinsic  
95 manner, triggers spontaneous pauses during T cell motility that fine-tunes the search for  
96 cognate antigens.

97

## 98 **Results**

### 99 **Validating a dominant-negative construct to inhibit Orai1 in human T cells**

100 To study the role of Orai1 channel activity in T cell motility, we took a molecular genetic  
101 approach using the dominant-negative mutant Orai1-E106A to selectively eliminate ion  
102 conduction through the Orai1 pore. The glutamate residue at position 106 in human Orai1  
103 forms the selectivity filter of the Orai1 pore (Prakriya, Feske et al. 2006, Vig, Beck et al.  
104 2006, Yeromin, Zhang et al. 2006), and because the Orai1 channel is a functional  
105 hexamer (Hou, Pedi et al. 2012), mutation of E106 to neutrally charged alanine  
106 completely inhibits  $\text{Ca}^{2+}$  permeation in a potent dominant-negative manner (Greenberg,  
107 Yu et al. 2013). We confirmed Orai1 channel block by E106A by fura-2  $\text{Ca}^{2+}$  imaging in  
108 activated human T cells transfected with either eGFP-tagged Orai1-E106A or empty  
109 vector for control. Following thapsigargin treatment to deplete the ER  $\text{Ca}^{2+}$  store,  $\text{Ca}^{2+}$   
110 entry was greatly diminished in cells expressing eGFP-Orai1-E106A identified by  
111 fluorescence, referred to here as eGFP-E106<sup>hi</sup> T cells, compared to empty vector-  
112 transfected control cells (**Figure 1A**).  $\text{Ca}^{2+}$  entry was also partially inhibited in some  
113 transfected T cells even though their eGFP fluorescence was too low to detect. We refer  
114 to this mixed population as eGFP-E106A<sup>lo</sup> cells. To further confirm that eGFP-E106A  
115 inhibits T cell activation, we challenged transfected human T cells with autologous  
116 dendritic cells pulsed with the superantigen Staphylococcal enterotoxin B (Lioudyno,  
117 Kozak et al. 2008). T cell proliferation was markedly suppressed in eGFP-E106A<sup>hi</sup> CD4<sup>+</sup>  
118 and CD8<sup>+</sup> T cells, but not in eGFP-E106A<sup>lo</sup> T cells (**Supplementary Figure 1A**). This  
119 shows that reduced Orai1 channel activity present in eGFP-E106A<sup>lo</sup> T cells is sufficient  
120 for T cell activation and proliferation. Taken together, these experiments show that eGFP-

121 tagged Orai1-E106A expression can serve as a robust tool to assess cellular roles of  
122 Orai1 channel activity, and that transfected cells without detectable eGFP fluorescence  
123 can be used as an internal control.

124 Orai1 function in human T cell motility was evaluated *in vivo* using a human  
125 xenograft model in which immunodeficient NOD.SCID.β2 mice were reconstituted with  
126 human peripheral blood lymphocytes, followed by imaging of excised lymph nodes using  
127 two-photon microscopy (Greenberg, Yu et al. 2013). Reconstitution has been shown to  
128 produce a high density of human immune cells within the lymph nodes of immunodeficient  
129 mice (Mosier, Gulizia et al. 1988), simulating the crowded migratory environment  
130 experienced by T cells under normal physiological conditions. Three weeks after  
131 reconstitution, human T cells were purified from the same donor, transfected, and  
132 adoptively transferred into the reconstituted NOD.SCID.β2 mice (**Supplementary Figure**  
133 **1B**). Whereas control T cells transfected with eGFP showed robust expression and  
134 successfully homed to lymph nodes following adoptive transfer 24 hr post-transfection  
135 (**Figure 1B**), eGFP-E106A transfected T cells did not home to lymph nodes when  
136 adoptively transferred 24 hr post-transfection (**Figure 1C**). This result confirms our  
137 previous study indicating that functional Orai1 channel activity is required for T cell  
138 homing to lymph nodes (Greenberg, Yu et al. 2013). To circumvent the homing defect,  
139 we injected eGFP-E106A transfected T cells only 3 hr post-transfection, before the  
140 expression level of eGFP-E106A had become sufficiently high to block lymph node entry  
141 (**Figure 1D**).

142

143 **Orai1 block increases human T cell motility within intact lymph node**

144 To evaluate Orai1 function in T cell motility, we imaged human T cells within intact lymph  
145 nodes of reconstituted NOD.SCID.β2 mice by two-photon microscopy (**Figure 2A**). We  
146 found that eGFP-E106A<sup>hi</sup> T cells migrated with higher average velocities than co-  
147 transferred, mock-transfected CMTMR-labeled T cells ( $12.8 \pm 0.5 \mu\text{m}/\text{min}$  vs.  $11.1 \pm 0.5$   
148  $\mu\text{m}/\text{min}$ ,  $p = 0.0268$ ; **Figure 2B**). Although both populations had similar maximum  
149 (Hodges-Lehmann median difference of  $-0.21 \mu\text{m}/\text{min}$ ,  $-2.82$  to  $2.16 \mu\text{m}/\text{min}$  95%CI) and  
150 minimum (Hodges-Lehmann median difference of  $-0.36 \mu\text{m}/\text{min}$ ,  $-1.02$  to  $0.36 \mu\text{m}/\text{min}$   
151 95%CI) instantaneous cell velocities (**Figure 2C**), the arrest coefficient, defined by the  
152 fraction of time that cell velocity was  $< 2 \mu\text{m}/\text{min}$ , was six-fold lower for eGFP-E106A<sup>hi</sup> T  
153 cells than for control T cells ( $0.02 \pm 0.01$  vs.  $0.12 \pm 0.03$ ,  $p = 0.0406$ ; **Figure 2D**). These  
154 differences in motility suggest that the increase in average cell velocity caused by Orai1  
155 block is not due to eGFP-E106A<sup>hi</sup> T cells moving faster than control T cells, but rather  
156 due to a reduced frequency of pausing. Consistent with this interpretation, no eGFP-  
157 E106A<sup>hi</sup> T cells with average velocities  $< 7 \mu\text{m}/\text{min}$  were observed, unlike control T cells  
158 in which 23% of average velocities were  $< 7 \mu\text{m}/\text{min}$  (**Figure 2E**).

159 To replicate our findings in a different immunodeficient mouse model, we repeated  
160 our human T cell adoptive transfer protocol using NOD.SCID mice depleted of NK cells.  
161 Lymph nodes in these mice are small and contain reticular structures but are completely  
162 devoid of lymphocytes (Shultz, Schweitzer et al. 1995). Similar to experiments on  
163 reconstituted NOD.SCID.β2 mice, eGFP-E106A<sup>hi</sup> human T cells in NOD.SCID lymph  
164 nodes migrated with elevated average velocities compared to control T cells ( $11.0 \pm 0.5$   
165  $\mu\text{m}/\text{min}$  vs.  $8.8 \pm 0.3 \mu\text{m}/\text{min}$ ,  $p = 0.0004$ ; **Figure 2F**), and exhibited lower arrest  
166 coefficients ( $0.10 \pm 0.02$  vs.  $0.16 \pm 0.01$ ,  $p = 0.0516$ ; **Figure 2G**). Both eGFP-E106A<sup>hi</sup> and



167 control T cells migrated at lower speeds in the NK-depleted NOD.SCID model compared  
168 to the reconstituted NOD.SCID.β2 model. Because control human T cells in reconstituted  
169 NOD.SCID.β2 lymph nodes migrated at similar speeds to what we have previously seen  
170 for wildtype mouse T cells *in vivo* (Miller, Wei et al. 2002), reconstitution results in a lymph  
171 node environment that more closely mimics normal physiological conditions.  
172 Furthermore, the greater effect of Orai1 block on T cell arrest coefficients in crowded  
173 reconstituted lymph nodes suggests that Orai1's role in motility is more pronounced in  
174 crowded cell environments.

175

176 **Orai1 channel activity triggers pauses during human T cell motility *in vitro* in the**  
177 **absence of extrinsic cell contact**

178 To evaluate whether the pronounced effect of Orai1 channel block on the arrest  
179 coefficient in reconstituted lymph nodes was a result of environmental factors such as  
180 increased cellular contacts or increased confinement, we tracked human T cells in  
181 microfabricated PDMS chambers with cell-sized microchannels 7 μm high x 8 μm wide.  
182 These ICAM-1 coated microchannels simulate the confined environment of densely  
183 packed lymph nodes (Jacobelli, Friedman et al. 2010), while eliminating possible cell-  
184 extrinsic factors. Transfected human T cells were activated with plate-bound anti-CD3/28  
185 antibodies and soluble IL-2, then dropped into chambers and monitored by time-lapse  
186 confocal microscopy, using phase contrast to visualize eGFP-E106A<sup>lo</sup> T cells (**Figure**  
187 **3A,B**). Upon entry into microchannels, eGFP-E106A<sup>hi</sup> T cells migrated with higher  
188 average cell velocities than eGFP-E106A<sup>lo</sup> T cells ( $14.2 \pm 0.6$  μm/min vs.  $10.9 \pm 0.5$   
189 μm/min,  $p < 0.0001$ ; **Figure 3C**), similar to our *in vivo* findings from intact lymph node

190 (*c.f.*, **Figures 3C, 2B**). To ensure that the observed difference in cell velocity was due to  
191 suppressed Orai1 channel function and not overexpression of Orai1 protein, we also  
192 tracked T cells transfected with eGFP-tagged wildtype Orai1. Both eGFP-Orai1<sup>hi</sup> and  
193 eGFP-Orai1<sup>lo</sup> T cells migrated at the same average cell velocity ( $10.7 \pm 0.8 \mu\text{m}/\text{min}$  vs.  
194  $10.5 \pm 0.8 \mu\text{m}/\text{min}$ ; Hodges-Lehmann median difference of  $-0.84 \mu\text{m}/\text{min}$ ,  $-2.96$  to  $1.28$   
195  $\mu\text{m}/\text{min}$  95%CI; **Figure 3C**), demonstrating that Orai1 channel overexpression, in itself,  
196 does not perturb T cell motility in microchannels. Since eGFP-E106A<sup>lo</sup> T cells have  
197 reduced Orai1 channel activity but still retain the same cell velocity as eGFP-Orai1  
198 transfected T cells (*c.f.*, **Figures 1A, 3C**), this suggests that partial Orai1 function is  
199 sufficient to generate normal pausing frequency in confined environments. The frequency  
200 distribution of cell velocities *in vitro* is comparable to our *in vivo* data: fewer GFP-E106A<sup>hi</sup>  
201 T cells migrated with average cell velocities  $< 7 \mu\text{m}/\text{min}$  as compared to eGFP-E106A<sup>lo</sup> T  
202 cells (11% vs 29%; *c.f.*, **Figures 3D, 2E**). Furthermore, eGFP-E106A<sup>hi</sup> T cells exhibited  
203 lower arrest coefficients ( $0.05 \pm 0.01$  vs.  $0.08 \pm 0.01$ ,  $p = 0.0015$ ; **Figure 3E**) and less  
204 variation in velocity than eGFP-E106A<sup>lo</sup> T cells ( $39.5 \pm 1.9 \%$  vs.  $45.1 \pm 1.6 \%$ ,  $p = 0.0138$ ;  
205 **Figure 3F**). Although eGFP-E106A<sup>hi</sup> T cells had lower arrest coefficients, the durations  
206 of their pauses were not significantly different than in eGFP-E106A<sup>lo</sup> T cells (Hodges-  
207 Lehmann median difference of 0 seconds,  $-8.43$  to  $4.71$  seconds 95%CI; **Figure 3G**).  
208 Taken together, the reduced arrest coefficients in eGFP-E106A<sup>hi</sup> T cells without any  
209 change in the durations of pauses indicate that inhibition of Orai1 channel activity results  
210 in reduced frequency of pauses during T cell motility. These *in vitro* results confirm our *in*  
211 *vivo* findings and support the hypothesis that Orai1 activity intermittently triggers cell  
212 arrest, resulting in an overall decrease in motility within confined environments. Moreover,

213 since our *in vitro* microchannel assay eliminates extrinsic cell-cell interactions, this  
214 indicates that Orai1 is activated in a cell-intrinsic manner when modulating T cell motility.

215

### 216 **A novel ratiometric genetically encoded Ca<sup>2+</sup> indicator, Salsa6f**

217 In order to develop a better tool to monitor Ca<sup>2+</sup> signaling in T cells both *in vivo* and *in*  
218 *vitro*, we took advantage of the latest generation of genetically encoded Ca<sup>2+</sup> indicators  
219 (GECIs) (Zhao, Araki et al. 2011, Chen, Wardill et al. 2013). A variety of single fluorescent  
220 protein-based GECIs were transiently expressed and screened in HEK 293A cells  
221 (**Figure 4A**), and GCaMP6f was selected based on fluorescence intensity, dynamic  
222 range, and Ca<sup>2+</sup> affinity ( $k_d = 373$  nM) suitable for detecting a variety of cytosolic Ca<sup>2+</sup>  
223 signals. To enable cells to be tracked even when their basal Ca<sup>2+</sup> level evokes little  
224 GCaMP6f fluorescence, we fused GCaMP6f to the Ca<sup>2+</sup>-insensitive red fluorescent  
225 protein tdTomato, chosen for its photostability and efficient two-photon excitation  
226 (Drobizhev, Makarov et al. 2011). A V5 epitope tag (Lobbestael E 2010) serves to link  
227 tdTomato to GCaMP6f (**Figure 4C**). The resultant ratiometric fusion indicator, coined  
228 “Salsa6f” for the combination of red tdTomato with the green GCaMP6f, was readily  
229 expressed by transfection into HEK 293A cells or human T cells. Salsa6f exhibited a ten-  
230 fold dynamic range, with a brightness comparable to GCaMP6f alone (**Figure 4A,B**). For  
231 two-photon microscopy, both components of Salsa6f can be visualized by femtosecond  
232 excitation at 900 nm (**Figure 4D**). GCaMP6f produces increased green fluorescence  
233 during elevations in cytosolic Ca<sup>2+</sup>, while tdTomato provides a stable red fluorescence  
234 that facilitates cell tracking and allows for ratiometric Ca<sup>2+</sup> imaging (**Figure 4D, Video 1**).  
235 Salsa6f is excluded from the nucleus, ensuring accurate measurement of cytosolic Ca<sup>2+</sup>

236 fluctuations (**Figure 4D**). When expressed in human T cells, Salsa6f reported  $\text{Ca}^{2+}$   
237 oscillations induced by immobilized anti-CD3/28 antibodies with a high signal to noise  
238 ratio and time resolution (**Figure 4E,F**).

239

### 240 **Spontaneous $\text{Ca}^{2+}$ signals during confined motility *in vitro* are correlated with** 241 **reduced T cell velocity**

242 Human  $\text{CD4}^+$  T cells were transfected with Salsa6f, activated for two days with plate-  
243 bound anti-CD3/28 antibodies, then dropped into ICAM-1 coated microchambers. As  
244 previously shown (**Figure 4E**), Salsa6f is localized to the cytosol, with red fluorescence  
245 from tdTomato that reflects fluctuations in cell movement and very low baseline green  
246 fluorescence from GCaMP6f that rises sharply during  $\text{Ca}^{2+}$  signals (**Figure 5A-D**).  
247 Salsa6f-transfected human T cells were tracked in both confined microchannels (**Figure**  
248 **5A, Video 2**) and the open space adjacent to entry into microchannels (**Figure 5C, Video**  
249 **3**), to evaluate T cell motility under varying degrees of confinement. Intracellular  $\text{Ca}^{2+}$   
250 levels were monitored using the ratio of total GCaMP6f fluorescence intensity over total  
251 tdTomato fluorescence intensity, enabling detection of a notably stable baseline ratio  
252 unaffected by motility artifacts in moving T cells while reporting spontaneous  $\text{Ca}^{2+}$  signals  
253 that could be compared to changes in motility (**Figure 5B,D**, orange and black traces,  
254 respectively).

255 Human T cells expressing Salsa6f migrating in confined microchannels exhibited  
256 stable baseline cytosolic  $\text{Ca}^{2+}$  levels (**Figure 6A**), although sporadic  $\text{Ca}^{2+}$  signals were  
257 apparent as brief peaks unrelated to changes in motility (**Figure 6B**, arrowheads), or as  
258 more sustained periods of  $\text{Ca}^{2+}$  elevation associated with reduced cell velocity (**Figure**

259 **6B**, gray highlights). To evaluate the correspondence between T cell velocity and  $\text{Ca}^{2+}$   
260 signals, we compared average T cell velocities during periods of sustained  $\text{Ca}^{2+}$   
261 elevations to average velocities at baseline  $\text{Ca}^{2+}$  levels. T cell velocity decreased  
262 significantly when cytosolic  $\text{Ca}^{2+}$  was elevated above baseline ( $5.9 \pm 0.1 \mu\text{m}/\text{min}$  vs.  $10.0$   
263  $\pm 0.1 \mu\text{m}/\text{min}$ ,  $p < 0.0001$ ; **Figure 6C**).  $\text{Ca}^{2+}$  signaling episodes that last for 30 seconds  
264 or longer accompany and appear to closely track the duration of pauses in cell movement.  
265 Comparison of instantaneous velocities with corresponding cytosolic  $\text{Ca}^{2+}$  signals by  
266 scatter plot revealed a strong inverse relationship: highly motile T cells always exhibited  
267 baseline  $\text{Ca}^{2+}$  levels, while elevated  $\text{Ca}^{2+}$  levels were only found in slower or arrested T  
268 cells (**Figure 6D**). It is important to note that these  $\text{Ca}^{2+}$  signals and reductions in velocity  
269 occurred in the absence of any extrinsic cell contact or antigen recognition, indicating that  
270  $\text{Ca}^{2+}$  elevations, like pausing and Orai1 activation, are triggered in a cell-intrinsic manner.

271 To compare the effects of Orai1 activity on the motility of T cells in different *in vitro*  
272 environments, we also monitored T cell migration within the open space in PDMS  
273 chambers adjacent to entry into microchannels (*c.f.*, **Figure 5A,C**). We reasoned that in  
274 this two-dimensional space with reduced confinement, T cells may not gain sufficient  
275 traction for rapid motility, and instead may favor integrin-dependent sliding due to  
276 increased exposure to the ICAM-1 coated surface (Krummel, Friedman et al. 2014). In  
277 addition, the same population of T cells could be tracked as they migrated into and along  
278 the confined microchannels, providing a valuable internal control. We found that eGFP-  
279 E106A<sup>hi</sup> T cells migrated with similar velocities to eGFP-E106A<sup>lo</sup> T cells in the open space  
280 ( $12.0 \pm 1.0 \mu\text{m}/\text{min}$  vs.  $12.2 \pm 0.7 \mu\text{m}/\text{min}$ ; Hodges-Lehmann median difference of  $0.15$   
281  $\mu\text{m}/\text{min}$ ,  $-2.46$  to  $2.40 \mu\text{m}/\text{min}$  95%CI; **Figure 6E**), but these eGFP-E106A<sup>hi</sup> T cells still

282 exhibited higher motility in the microchannels than eGFP-E106A<sup>lo</sup> T cells ( $15.4 \pm 1.2$   
283  $\mu\text{m}/\text{min}$  vs.  $11.3 \pm 1.0 \mu\text{m}/\text{min}$ ;  $p = 0.0099$ ; **Figure 6E**). Furthermore, Salsa6f transfected  
284 T cells within the open space rarely produced  $\text{Ca}^{2+}$  transients that coincided with reduced  
285 instantaneous velocity (*c.f.*, **Figure 6D,F**, top left quadrants, 13% of the time in  
286 microchannels vs 2% in open space), implying that  $\text{Ca}^{2+}$  elevations, and by extension,  
287 Orai1 channel activity, do not generate pauses when T cells are reliant on integrin binding  
288 for motility. Taken together, these experiments establish a role for the cell-intrinsic  
289 activation of Orai1 channels in modulating T cell motility within confined environments.  
290

## 291 Discussion

292 In this study, we demonstrate that Orai1 channel activity regulates motility patterns that  
293 underlie immune surveillance, specifically within confined environments. Human T cells  
294 expressing the dominant-negative Orai1-E106A construct migrated with higher average  
295 velocities than controls, both *in vivo* in immunodeficient mouse lymph nodes and *in vitro*  
296 in confined microchannels. In particular, we found that the increase in average cell  
297 velocity was not due to an increase in maximum cell velocity, but to a reduced frequency  
298 of cell arrest. Furthermore, we introduce a novel ratiometric genetically encoded Ca<sup>2+</sup>  
299 indicator, Salsa6f, and show in confined microchannels devoid of cell-extrinsic factors,  
300 that human T cells exhibit spontaneous Ca<sup>2+</sup> signals that coincide with reduced cell  
301 velocity. We propose that cell-intrinsic activation of Orai1 channel activity regulates the  
302 timing of stop-and-go motility in T cells and tunes the search for cognate antigen in the  
303 crowded lymph node.

304 Salsa6f preserves the exceptional performance of GCaMP6f, with similar  
305 brightness and dynamic range, and adds to it the bright fluorescence of tdTomato,  
306 allowing cell tracking in the absence or presence of Ca<sup>2+</sup> signaling. FRET based  
307 ratiometric indicators (Heim and Griesbeck 2004, Thestrup, Litzlbauer et al. 2014) lack  
308 the brightness and dynamic range of Salsa6f. Exclusion of Salsa6f from the nucleus  
309 enables precise monitoring of cytosolic Ca<sup>2+</sup> signals. In addition, we observed no overt  
310 effects of Salsa6f expression on cell behavior. Ratiometric imaging of Salsa6f eliminates  
311 motility artifacts and reveals stable baseline levels of Ca<sup>2+</sup> in the cytoplasm of rapidly  
312 moving human T cells; this finding enables Ca<sup>2+</sup> signals to be identified clearly and their  
313 temporal progression followed precisely. Moreover, both GCaMP6f and tdTomato

314 components of Salsa6f can be visualized in two-photon microscopy by femtosecond  
315 excitation at 900nm. The genetically encoded nature of Salsa6f allows it to be  
316 continuously expressed in stably integrated cell lines or transgenic reporter animals,  
317 enabling tracking of cell fates and long term studies. Taken together, these considerations  
318 indicate that Salsa6f is well suited for assessing links between Ca<sup>2+</sup> signaling and T cell  
319 motility and activation, and demonstrate that Salsa6f could be usefully employed to study  
320 Ca<sup>2+</sup> signaling dynamics in many other cell types.

321         Our Orai1-E106A construct derives its specificity and potency by targeting the pore  
322 residue responsible for the channel selectivity filter. Incorporation of Orai1-E106A likely  
323 blocks heterodimers of Orai1 and other channels, such as Orai2 or Orai3, in addition to  
324 homomeric Orai1 channels. Very recent evidence demonstrates the existence of  
325 heteromeric channels composed of Orai1 and Orai2 in T cells (Vaeth, Yang et al. 2017).  
326 These heteromers appear to simply reduce the flow of Ca<sup>2+</sup> through the Orai1 channel  
327 without targeting additional signaling pathways. In the absence of contradictory evidence,  
328 we conclude that in T cells Orai1-E106A acts to produce an essentially complete  
329 functional knockdown of Orai1-mediated store-operated Ca<sup>2+</sup> entry.

330         In lymph nodes, T cells experience a dense and crowded environment packed with  
331 fibroblastic reticular cells, resident dendritic cells, and numerous other migrating immune  
332 cells (Miller, Wei et al. 2002, Bajenoff, Egen et al. 2006). Over the last decade there has  
333 been a developing realization that mechanisms of motility in the lymph node differ in  
334 important ways from mechanisms used in less densely packed tissues and in standard,  
335 adhesion-rich *in vitro* assays. First, integrins – key determinants of lymphocyte adhesion  
336 and key components of *in vitro* motility assays – are dispensable for T cell and dendritic



337 cell motility in the lymph node, where the absence of shear forces prevent stable integrin  
338 adhesiveness (Woolf, Grigorova et al. 2007, Lammermann, Bader et al. 2008). Second,  
339 theoretical and experimental work suggested the existence of a novel motility mode in  
340 which confined cells brace against their neighbors to push through crowded environments  
341 (Hawkins, Piel et al. 2009). Third, development of an *in vitro* assay using microchannels  
342 has enabled cell confinement to be varied *in vitro*, allowing confinement to be studied in  
343 isolated cells and mimicking the effects of cell crowding inside intact tissues such as the  
344 lymph node (Jacobelli, Friedman et al. 2010). Under confined conditions that elicit  
345 maximal cell velocities, T cells utilize high speed “amoeboid walking” which relies on  
346 multiple brief contacts to substrate, independent of integrin function. This motility mode  
347 appears to be driven by actin-network expansion and contraction of myosin IIA motors,  
348 which facilitates protrusive flowing of the cell’s leading edge (Jacobelli, Friedman et al.  
349 2010, Krummel, Friedman et al. 2014). Taken together, these studies indicate that  
350 amoeboid walking is the predominant mode of T cell motility within lymph nodes.

351       Alternatively, when abundant extracellular adhesion molecules are available, T  
352 cells favor an integrin-dependent motility mode termed “haptokinetic sliding”, such as in  
353 peripheral tissues, or in open field cell motility assays (Svensson, McDowall et al. 2010,  
354 Krummel, Friedman et al. 2014). Haptokinetic sliding is generally slower than amoeboid  
355 walking and relies upon a single continuous zone of contact to substrate. Integrin-  
356 dependent open field *in vitro* assays have been used to highlight the accumulation of  
357  $K_{Ca}3.1$  and TRPM7 channels at the uropod where the  $Ca^{2+}$  dependent protease calpain-  
358 2 may regulate turnover of LFA-1 adhesions (Svensson, McDowall et al. 2010, Kuras,  
359 Yun et al. 2012). While these integrin-dependent assays reportedly exclude a role for

360 Orai1 in T cell motility, we argue that they do not reflect the predominant mode of motility  
361 used *in vivo* in the lymph node, and so do not bear directly upon the involvement of Orai1  
362 in T cell motility in the lymph node. However, assessing integrin-dependent motility in  
363 parallel with confinement-dependent motility allows identification of motility mode-specific  
364 mechanisms and controls for cell health and cytoskeletal integrity.

365 Many studies demonstrate that Ca<sup>2+</sup> influx through Orai1 is a signal that selectively  
366 activates downstream effectors, including calmodulin, calcineurin, and the transcription  
367 factor NFAT (Dolmetsch and Lewis 1994, Negulescu, Shastri et al. 1994, Dolmetsch,  
368 Lewis et al. 1997, Kar, Samanta et al. 2014). We observe inhibition of pausing by Orai1  
369 block only under confined conditions both *in vitro* and *in vivo*; this indicates that Orai1  
370 block is not generally deleterious for cell health and movement, but instead acts upon  
371 subcellular mechanisms that are selectively employed during confined motility. The  
372 maximum cell velocity and mean pause length are unchanged by Orai1 block. Instead,  
373 Orai1 block selectively alters the timing of when pauses are triggered during T cell motility.  
374 The selective alteration of timing by mutation is a hallmark of cell regulatory pathways  
375 and, together with the widespread signaling roles already ascribed to Orai1 in other  
376 systems, establishes that Orai1 channel activity acts to regulate T cell motility. This model  
377 is supported by our Ca<sup>2+</sup> imaging data: episodes of Ca<sup>2+</sup> signaling lasting longer than 30  
378 s coincide with pauses in cell movement. In many contexts, Ca<sup>2+</sup> signaling has been to  
379 shown not only accompany, but also to cause, cell arrest and loss of cell polarity, such  
380 as in T cells after activation by antigen (Negulescu, Krasieva et al. 1996, Dustin, Bromley  
381 et al. 1997, Wei SH 2007). While we do not show that the Ca<sup>2+</sup> signals we observe  
382 emanate directly from Orai1 channels, taken together our data are consistent with Orai1

383 actively regulating cell motility by directly inducing subcellular mechanisms that lead to  
384 cell arrest.

385 In previous studies of Orai1 signaling, Orai1 activation has been placed  
386 downstream of extracellular ligand binding to cell surface receptors, integrating their input  
387 upon use-dependent depletion of  $\text{Ca}^{2+}$  from the ER (Feske 2007, Cahalan and Chandy  
388 2009). Using *in vitro* microchannel assays, we find that Orai1 block alters motility in the  
389 absence of ongoing cell-cell interactions. Therefore, Orai1 is activated in an unknown cell-  
390 intrinsic manner; at this point it is unclear which aspects of internal cell state lead to Orai1  
391 channel opening and pauses in motility. Our identification of Orai1 provides a clear new  
392 entry into mechanisms that drive T cells motility patterns used for immune surveillance.  
393 Of particular interest is determining the step in the signaling cascade from phospholipase  
394 C to Orai1 that is targeted by this novel activation pathway.

395 The apparently random nature of naïve T cell movement in the lymph node has  
396 led to the hypothesis that T cells use intrinsic and stochastic motility mechanisms to  
397 accomplish immune surveillance (Wei, Parker et al. 2003, Mrass, Petravac et al. 2010,  
398 Germain, Robey et al. 2012). Because of recent studies, our understanding of the  
399 molecular mechanisms that produce intrinsic motility patterns is beginning to take shape  
400 (Jacobelli, Friedman et al. 2010, Gerard, Patino-Lopez et al. 2014). Myosin 1g, like Orai1,  
401 is selectively required for cell-intrinsic motility mechanisms under confined conditions  
402 (Gerard, Patino-Lopez et al. 2014). Yet differences in phenotype between Orai1 and  
403 Myo1g block suggest that these proteins act in different, and in part opposing, ways to  
404 control T cell motility. While Orai1 block reduces pausing but does not alter T cell velocity,  
405 Myo1g block increases pausing and causes cells to move faster. Our observations

406 support the assertion that Myo1g and Orai1 act in parallel cell-intrinsic pathways that  
407 jointly modulate T cell motility.

408 Our identification of an intrinsic Orai1-dependent T cell motility program provides  
409 further support for the hypothesis that intrinsic and stochastic T cell motility patterns  
410 underlie immune surveillance in the lymph node. Immune surveillance requires balancing  
411 many factors associated with antigen search, including speed and sensitivity. Myo1g  
412 activity biases surveillance toward sensitivity by increasing the duration of individual T  
413 cell- dendritic cell contacts. Pauses in motility caused by Orai1 activity could allow similar  
414 biases in surveillance by increasing the fraction of time that, collectively, T cells are  
415 stationary and available for extended contacts with dendritic cells. Moreover, in the  
416 absence of other motility changes, the interval between Orai1-dependent pauses  
417 determines the distance T cells travel between pauses. In this way Orai1 channel activity  
418 could tailor T cell excursions to match the density and reach of dendritic cells in the lymph  
419 node.

## 420 **Acknowledgments**

421 We thank Drs. Lurette Forrest and Olga Safrina for expert assistance, excellent animal  
422 care and vivarium support, and Dr. Audrey Gerard, the Matthew Krummel Lab at UCSF,  
423 and the Christopher Hughes Lab at UCI for assistance in establishing the microchamber  
424 fabrication technique. We acknowledge the UC Irvine Institute for Clinical and  
425 Translational Science, and Dr. Jennifer Atwood of the Flow Core Facility supported by the  
426 UC Irvine Institute of Immunology.

427

## 428 **Methods**

### 429 **Human T cell purification and transfection**

430 Human PBMCs were isolated from blood of voluntary healthy donors by Histopaque-1077  
431 (1.077 g/mL; Sigma, St. Louis, MO) density gradient centrifugation. Human CD3<sup>+</sup>, CD4<sup>+</sup>,  
432 or CD8<sup>+</sup> T cells were isolated using the appropriate EasySep Human T Cell Isolation Kit  
433 (StemCell Technologies, Vancouver, Canada) according to manufacturer's instructions.  
434 The purity of isolated cells was confirmed to be >95% by flow cytometry. Purified cells  
435 were rested overnight in complete RPMI, then transfected by nucleofection (Lonza,  
436 Walkersville, MD), using the high-viability "U-014" protocol. Enhanced green fluorescent  
437 protein (eGFP)-tagged wildtype Orai1, eGFP-tagged Orai1-E106A mutant, Salsa6f  
438 (tdTomato-V5-GCaMP6f construct), or empty vector control were transfected as  
439 indicated. Human T cells were used for experiments 3-48 hr after transfection. For *in vitro*  
440 imaging experiments, T cells were rested for 3-4 hr in complete RPMI as indicated in the  
441 manufacturer's instructions, then washed and activated on plate-bound  $\alpha$ CD3 and  $\alpha$ CD28  
442 (Tonbo Biosciences, San Diego, CA) in 2.5 ng/mL recombinant human IL-2 (BioLegend,  
443 San Diego, CA), and imaged 24-48 hr after transfection.

444

### 445 **Mice**

446 NOD.Cg-*Prkdc*<sup>scid</sup>*B2m*<sup>tm1Unc</sup>/J (NOD.SCID.β2) and NOD.CB17-*Prkdc*<sup>scid</sup>/J (NOD.SCID)  
447 mice obtained from Jackson Laboratory (Stock #002570 and #001303) were housed and  
448 monitored in a selective pathogen-free environment with sterile food and water in the  
449 animal housing facility at the University of California, Irvine. NOD.SCID.β2 mice were  
450 reconstituted with human peripheral blood leukocytes (PBLs) as described previously

451 (Mosier, Gulizia et al. 1988). A total of  $3 \times 10^7$  human PBLs were injected i.p., and  
452 experiments were performed three weeks later. To inhibit NK cell activity, NOD.SCID  
453 mice were i.p. injected with 20  $\mu$ L anti-NK cell antibody (rabbit anti-Asialo GM1, Wako  
454 Chemicals, Irvine, CA) according to manufacturer's instructions 3-4 days before adoptive  
455 transfer of human T cells. Mice used were between 8 and 18 weeks of age. For adoptive  
456 transfer experiments,  $5 \times 10^6$  human CD3<sup>+</sup> T cells were labeled with 10  $\mu$ M CellTracker  
457 CMTMR dye (Invitrogen, Carlsbad, CA) for 10 min at 37 °C and adoptively transferred  
458 into NOD.SCID. $\beta$ 2 or NOD.SCID mice by tail-vein or retro-orbital injection.

459

#### 460 **Two-photon imaging and analysis**

461 Multi-dimensional (x, y, z, time, emission wavelength) two-photon microscopy was  
462 employed to image fluorescently labeled lymphocytes in explanted mouse lymph nodes,  
463 using a 780 nm femtosecond pulsed laser as described previously (Matheu, Su et al.  
464 2012). Fluorescence emission was split by 510 nm & 560 nm dichroic mirrors into three  
465 detector channels, used to visualize eGFP-Orai1E106A transfected (green) adoptively-  
466 transferred cells, CMTMR-labelled control cells (red), and collagen (blue). For imaging,  
467 lymph nodes were oriented with the hilum away from the water dipping microscope  
468 objective (Olympus 20x, NA 0.9) on an upright microscope (Olympus BX51). The node  
469 was maintained at 36-37 °C by perfusion with medium (RPMI) bubbled with carbogen  
470 (95% O<sub>2</sub> / 5% CO<sub>2</sub>). 3D image stacks of x=200  $\mu$ m, y=162  $\mu$ m, and z=50  $\mu$ m were  
471 sequentially acquired at 18-20 second intervals using MetaMorph software (Molecular  
472 Devices, Sunnyvale, CA). This volume collection was repeated for up to 40 min to create  
473 a 4D data set. Data were processed and analyzed using Imaris software (Bitplane USA,

474 Concord, MA), and the x,y,z coordinates of individual lymphocytes in the intact lymphoid  
475 organ were used to create individual cell tracks.

476

### 477 **Microchannel fabrication and imaging**

478 Microchannel fluidic devices were fabricated by a soft lithography technique with PDMS  
479 (polydimethylsiloxane; Sylgard Elastomer 184 kit; Dow Corning, Auburn, MI) as described  
480 (Jacobelli, Friedman et al. 2010, Gerard, Patino-Lopez et al. 2014). PDMS base and  
481 curing agent were mixed 10:1 and poured onto the silicon master, then left overnight in  
482 vacuum. Once the PDMS was set, it was baked at 55 °C for 1 hr and cooled at room  
483 temperature. The embedded microchambers were then cut from the mold, and a cell well  
484 was punched adjacent to entry into the channels. The PDMS cast and a chambered  
485 coverglass (Nunc Lab-Tek, ThermoFisher, Grand Island, NY) were activated for two  
486 minutes in a plasma cleaner (Harrick Plasma, Ithaca, NY), bonded together, then  
487 incubated at 55 °C for 10 min. Prepared chambers were stored for up to 1 month before  
488 use. Prior to imaging, microchambers placed in the plasma cleaner for 5 min under  
489 vacuum and 1 min of activation, then coated with 5 µg/mL recombinant human ICAM-  
490 1/CD54 Fc (R&D Systems, Minneapolis, MN) in PBS for at least 1 hr at 37 °C. The  
491 microchambers were then washed three times with PBS, and T cells were loaded into cell  
492 wells ( $3-5 \times 10^5$  cells resuspended in 10 µL) and incubated at 37 °C for at least 1 hr before  
493 imaging.

494

### 495 **Confocal imaging and analysis**

496 Two different Olympus confocal microscopy systems were used to image T cells *in vitro*.  
497 For experiments tracking T cell motility in microchambers, we used the self-contained  
498 Olympus Fluoview FV10i-LIV, with a 473 nm diode laser for excitation and a 60x phase  
499 contrast water immersion objective (NA 1.2). The FV10i-LIV contains a built-in incubator  
500 set to 37 °C, together with a Tokai-Hit stagetop incubator to maintain local temperature  
501 and humidity. T cells were imaged in RPMI adjusted to 2 mM Ca<sup>2+</sup> and 2% FCS, and  
502 mounted at least half an hour before imaging to allow for equilibration. Cells were imaged  
503 at 20-sec intervals for 20-30 min, and the data analyzed using Imaris software. For Ca<sup>2+</sup>  
504 imaging of Salsa6f transfected T cells, we used a Fluoview FV3000RS confocal laser  
505 scanning microscope, equipped with high speed resonance scanner and the IX3-ZDC2  
506 Z-drift compensator. Diode lasers (488 and 561 nm) were used for excitation, and two  
507 high sensitivity cooled GaAsP PMTs were used for detection. Cells were imaged using  
508 the Olympus 40x silicone oil objective (NA 1.25), by taking 4 slice z-stacks at 1.5 μm/step,  
509 at 3 sec intervals, for up to 20 min. Temperature, humidity, and CO<sub>2</sub> were maintained  
510 using a Tokai-Hit WSKM-F1 stagetop incubator. Data were processed and analyzed  
511 using Imaris software.

512

### 513 **GECI Screening and Salsa6f Plasmid Generation**

514 Plasmids encoding GECIs (GECO and GCaMP6) were obtained from Addgene for  
515 screening in live cells. Each probe was cotransfected with Orai1 and STIM1 into HEK  
516 293A cells using Lipofectamine 2000 (Invitrogen, Carlsbad, CA) for 48 hr before  
517 screening on an epifluorescence microscope. For construction of Salsa6f, tdTomato was  
518 obtained from Addgene, and the pEGP-N1 vector (Clontech, Mountain View, CA) was



519 used as a backbone. GCaMP6f was amplified via PCR with N- and C-terminal primers (5'  
520 CACAACCGGTCGCCACCATGGTCGACTCATCACGTC 3' and 5'  
521 AGTCGCGGCCGCTTTAAAGCTTCGCTGTCATCATTTGTAC 3') and ligated into  
522 pEGFP-N1 at the AgeI/NotI sites to replace the eGFP gene, while tdTomato was amplified  
523 via PCR with N- and C-terminal primers (5' ATCCGCTAGCGCTACCGGTCGCC 3' and  
524 5' TAACGAGATCTGCTTGTACAGCTCGTCCATGCC 3') and ligated into the backbone  
525 at the NheI/BglII sites. An oligo containing the V5 epitope tag was synthesized with sense  
526 and antisense strands (5'  
527 GATCTCGGGTAAGCCTATCCCTAACCCCTCCTCGGTCTCGATTCTACG 3' and 5'  
528 GATCCGTAGAATCGAGACCGAGAGAGGGTTAGGGATAGGCTTACCCGA 3') and  
529 ligated into the backbone at the BglII/BamHI sites, linking tdTomato to GCaMP6f and  
530 creating Salsa6f. The amplified regions of the construct were verified by sequencing (Eton  
531 Bioscience Inc., San Diego, CA). This plasmid, driven by the CMV promoter, was used  
532 for transient transfections in HEK 293A cells with Lipofectamine 2000 and in primary  
533 human T cells with Amaxa Nucleofection.

534

### 535 **Data Analysis and Statistical Testing**

536 Samples sizes were comparable to previous single cell analyses of motility (Jacobelli,  
537 Friedman et al. 2010, Greenberg, Yu et al. 2013, Gerard, Patino-Lopez et al. 2014). Each  
538 experiment used separate isolations of human T cells from different donors. With the  
539 exception of momentary velocities in Figure 6, each measurement corresponds to a  
540 different cell. Mean  $\pm$  standard error of the mean was used as a measure of the central  
541 tendency of distributions. Video analysis was performed using Imaris software, Spots

542 analysis was used for tracking of cell velocity and Volumes analysis was used for  
543 measuring total fluorescence intensity of GECl probes. To reduce selection bias in our  
544 analysis of motility and trajectory, all clearly visible and live cells were tracked from each  
545 video segment. The arrest coefficient is defined as fraction of time each cell had an  
546 instantaneous velocity  $< 2 \mu\text{m}/\text{min}$ . The coefficient of variation was defined for each  
547 individual cell as the standard deviation divided by the mean of its instantaneous velocity.  
548 For Salsa6f imaging analysis, ratio (R) was calculated by total GCaMP6f intensity divided  
549 by total tdTomato intensity, while initial ratio ( $R_0$ ) was calculated by averaging the ratios  
550 of the first five time points in each individual cell trace. Photobleaching of tdTomato  
551 fluorescence intensity (20-30% decline) was corrected in ratio calculations, as a linear  
552 function of time. Figures were generated using Prism 6 (GraphPad Software, San Diego,  
553 CA) and Origin 5 (OriginLabs, Northampton, MA). Due to the expectation that individual  
554 cells exhibit multiple motility modes, and to avoid assumptions concerning the shapes of  
555 motility distributions, non-parametric statistical testing was performed (Mann-Whitney  $U$   
556 test, unpaired samples, two-tailed). Differences with a  $P$  value of  $\leq 0.05$  were considered  
557 significant:  $*P \leq 0.05$ ;  $**P < 0.01$ ;  $***P < 0.005$ ;  $****P < 0.001$ . Similar distributions were  
558 compared using the Hodges-Lehmann median difference value and 95% confidence  
559 intervals under the assumption that the starting distributions had similar shapes.  
560

## 561 **References**

- 562 Babich, A. and J. K. Burkhardt (2013). "Coordinate control of cytoskeletal remodeling and calcium  
563 mobilization during T-cell activation." Immunol Rev **256**(1): 80-94.
- 564 Bajenoff, M., J. G. Egen, L. Y. Koo, J. P. Laugier, F. Brau, N. Glaichenhaus and R. N. Germain (2006).  
565 "Stromal cell networks regulate lymphocyte entry, migration, and territoriality in lymph nodes."  
566 Immunity **25**(6): 989-1001.
- 567 Bhakta, N. R., D. Y. Oh and R. S. Lewis (2005). "Calcium oscillations regulate thymocyte motility during  
568 positive selection in the three-dimensional thymic environment." Nat Immunol **6**(2): 143-151.
- 569 Bousso, P. and E. Robey (2003). "Dynamics of CD8<sup>+</sup> T cell priming by dendritic cells in intact lymph  
570 nodes." Nat Immunol **4**(6): 579-585.
- 571 Cahalan, M. D. and K. G. Chandy (2009). "The functional network of ion channels in T lymphocytes."  
572 Immunol Rev **231**(1): 59-87.
- 573 Cahalan, M. D. and I. Parker (2005). "Close encounters of the first and second kind: T-DC and T-B  
574 interactions in the lymph node." Semin Immunol **17**(6): 442-451.
- 575 Calloway, N., M. Vig, J. P. Kinet, D. Holowka and B. Baird (2009). "Molecular clustering of STIM1 with  
576 Orai1/CRACM1 at the plasma membrane depends dynamically on depletion of Ca<sup>2+</sup> stores and  
577 on electrostatic interactions." Mol Biol Cell **20**(1): 389-399.
- 578 Chen, T. W., T. J. Wardill, Y. Sun, S. R. Pulver, S. L. Renninger, A. Baohan, E. R. Schreiter, R. A. Kerr, M. B.  
579 Orger, V. Jayaraman, L. L. Looger, K. Svoboda and D. S. Kim (2013). "Ultrasensitive fluorescent  
580 proteins for imaging neuronal activity." Nature **499**(7458): 295-300.
- 581 Dixit, N., I. Yamayoshi, A. Nazarian and S. I. Simon (2011). "Migrational guidance of neutrophils is  
582 mechanotransduced via high-affinity LFA-1 and calcium flux." J Immunol **187**(1): 472-481.

583 Dolmetsch, R. E. and R. S. Lewis (1994). "Signaling between intracellular  $Ca^{2+}$  stores and depletion-  
584 activated  $Ca^{2+}$  channels generates  $[Ca^{2+}]_i$  oscillations in T lymphocytes." J Gen Physiol **103**(3):  
585 365-388.

586 Dolmetsch, R. E., R. S. Lewis, C. C. Goodnow and J. I. Healy (1997). "Differential activation of  
587 transcription factors induced by  $Ca^{2+}$  response amplitude and duration." Nature **386**(6627): 855-  
588 858.

589 Donnadieu, E., G. Bismuth and A. Trautmann (1994). "Antigen recognition by helper T cells elicits a  
590 sequence of distinct changes of their shape and intracellular calcium." Curr Biol **4**(7): 584-595.

591 Drobizhev, M., N. S. Makarov, S. E. Tillo, T. E. Hughes and A. Rebane (2011). "Two-photon absorption  
592 properties of fluorescent proteins." Nat Methods **8**(5): 393-399.

593 Dustin, M. L., S. K. Bromley, Z. Kan, D. A. Peterson and E. R. Unanue (1997). "Antigen receptor  
594 engagement delivers a stop signal to migrating T lymphocytes." Proc Natl Acad Sci U S A **94**(8):  
595 3909-3913.

596 Feske, S. (2007). "Calcium signalling in lymphocyte activation and disease." Nat Rev Immunol **7**(9): 690-  
597 702.

598 Feske, S., Y. Gwack, M. Prakriya, S. Srikanth, S. H. Puppel, B. Tanasa, P. G. Hogan, R. S. Lewis, M. Daly and  
599 A. Rao (2006). "A mutation in Orai1 causes immune deficiency by abrogating CRAC channel  
600 function." Nature **441**(7090): 179-185.

601 Gerard, A., G. Patino-Lopez, P. Beemiller, R. Nambiar, K. Ben-Aissa, Y. Liu, F. J. Totah, M. J. Tyska, S. Shaw  
602 and M. F. Krummel (2014). "Detection of rare antigen-presenting cells through T cell-intrinsic  
603 meandering motility, mediated by Myo1g." Cell **158**(3): 492-505.

604 Germain, R. N., E. A. Robey and M. D. Cahalan (2012). "A decade of imaging cellular motility and  
605 interaction dynamics in the immune system." Science **336**(6089): 1676-1681.

- 606 Greenberg, M. L., Y. Yu, S. Leverrier, S. L. Zhang, I. Parker and M. D. Cahalan (2013). "Orai1 function is  
607 essential for T cell homing to lymph nodes." J Immunol **190**(7): 3197-3206.
- 608 Hawkins, R. J., M. Piel, G. Faure-Andre, A. M. Lennon-Dumenil, J. F. Joanny, J. Prost and R. Voituriez  
609 (2009). "Pushing off the walls: a mechanism of cell motility in confinement." Phys Rev Lett  
610 **102**(5): 058103.
- 611 Heim, N. and O. Griesbeck (2004). "Genetically encoded indicators of cellular calcium dynamics based on  
612 troponin C and green fluorescent protein." J Biol Chem **279**(14): 14280-14286.
- 613 Hou, X., L. Pedi, M. M. Diver and S. B. Long (2012). "Crystal structure of the calcium release-activated  
614 calcium channel Orai." Science **338**(6112): 1308-1313.
- 615 Jacobelli, J., R. S. Friedman, M. A. Conti, A. M. Lennon-Dumenil, M. Piel, C. M. Sorensen, R. S. Adelstein  
616 and M. F. Krummel (2010). "Confinement-optimized three-dimensional T cell amoeboid motility  
617 is modulated via myosin IIA-regulated adhesions." Nat Immunol **11**(10): 953-961.
- 618 Kar, P., K. Samanta, H. Kramer, O. Morris, D. Bakowski and A. B. Parekh (2014). "Dynamic assembly of a  
619 membrane signaling complex enables selective activation of NFAT by Orai1." Curr Biol **24**(12):  
620 1361-1368.
- 621 Khan, O., M. Headley, A. Gerard, W. Wei, L. Liu and M. F. Krummel (2011). "Regulation of T cell priming  
622 by lymphoid stroma." PLoS One **6**(11): e26138.
- 623 Korkotian, E., E. Oni-Biton and M. Segal (2017). "The role of the store-operated calcium entry channel  
624 Orai1 in cultured rat hippocampal synapse formation and plasticity." J Physiol **595**(1): 125-140.
- 625 Krummel, M. F., F. Bartumeus and A. Gerard (2016). "T cell migration, search strategies and  
626 mechanisms." Nat Rev Immunol **16**(3): 193-201.
- 627 Krummel, M. F., R. S. Friedman and J. Jacobelli (2014). "Modes and mechanisms of T cell motility: roles  
628 for confinement and Myosin-IIA." Curr Opin Cell Biol **30C**: 9-16.

- 629 Kuras, Z., Y. H. Yun, A. A. Chimote, L. Neumeier and L. Conforti (2012). "K<sub>Ca</sub>3.1 and TRPM7 channels at  
630 the uropod regulate migration of activated human T cells." PLoS One **7**(8): e43859.
- 631 Lammermann, T., B. L. Bader, S. J. Monkley, T. Worbs, R. Wedlich-Soldner, K. Hirsch, M. Keller, R.  
632 Forster, D. R. Critchley, R. Fassler and M. Sixt (2008). "Rapid leukocyte migration by integrin-  
633 independent flowing and squeezing." Nature **453**(7191): 51-55.
- 634 Liou, J., M. L. Kim, W. D. Heo, J. T. Jones, J. W. Myers, J. E. Ferrell, Jr. and T. Meyer (2005). "STIM is a Ca<sup>2+</sup>  
635 sensor essential for Ca<sup>2+</sup>-store-depletion-triggered Ca<sup>2+</sup> influx." Curr Biol **15**(13): 1235-1241.
- 636 Lioudyno, M. I., J. A. Kozak, A. Penna, O. Safrina, S. L. Zhang, D. Sen, J. Roos, K. A. Stauderman and M. D.  
637 Cahalan (2008). "Orai1 and STIM1 move to the immunological synapse and are up-regulated  
638 during T cell activation." Proc Natl Acad Sci U S A **105**(6): 2011-2016.
- 639 Lobbstaël E, R. V., Ibrahimi A, Paesen K, Thiry I, Gijssbers R, Van den Haute C, Debyser Z, Baekelandt V,  
640 Taymans JM. (2010). "Immunohistochemical detection of transgene expression in the brain  
641 using small epitope tags." BMC Biotechnol.
- 642 Luik, R. M., M. M. Wu, J. Buchanan and R. S. Lewis (2006). "The elementary unit of store-operated Ca<sup>2+</sup>  
643 entry: local activation of CRAC channels by STIM1 at ER-plasma membrane junctions." J Cell Biol  
644 **174**(6): 815-825.
- 645 Matheu, M. P., Y. Su, M. L. Greenberg, C. A. Blanc, I. Parker, D. W. Scott and M. D. Cahalan (2012). "Toll-  
646 like receptor 4-activated B cells out-compete Toll-like receptor 9-activated B cells to establish  
647 peripheral immunological tolerance." Proceedings of the National Academy of Sciences of the  
648 United States of America **109**(20): E1258-1266.
- 649 Maus, M., M. Cuk, B. Patel, J. Lian, M. Ouimet, U. Kaufmann, J. Yang, R. Horvath, H. T. Hornig-Do, Z. M.  
650 Chrzanowska-Lightowlers, K. J. Moore, A. M. Cuervo and S. Feske (2017). "Store-Operated Ca<sup>2+</sup>  
651 Entry Controls Induction of Lipolysis and the Transcriptional Reprogramming to Lipid  
652 Metabolism." Cell Metab.

- 653 Mempel, T. R., S. E. Henrickson and U. H. Von Andrian (2004). "T-cell priming by dendritic cells in lymph  
654 nodes occurs in three distinct phases." Nature **427**(6970): 154-159.
- 655 Miller, M. J., A. S. Hejazi, S. H. Wei, M. D. Cahalan and I. Parker (2004). "T cell repertoire scanning is  
656 promoted by dynamic dendritic cell behavior and random T cell motility in the lymph node."  
657 Proc Natl Acad Sci U S A **101**(4): 998-1003.
- 658 Miller, M. J., S. H. Wei, I. Parker and M. D. Cahalan (2002). "Two-photon imaging of lymphocyte motility  
659 and antigen response in intact lymph node." Science **296**(5574): 1869-1873.
- 660 Miyawaki, A., J. Llopis, R. Heim, J. M. McCaffery, J. A. Adams, M. Ikura and R. Y. Tsien (1997).  
661 "Fluorescent indicators for Ca<sup>2+</sup> based on green fluorescent proteins and calmodulin." Nature  
662 **388**(6645): 882-887.
- 663 Moreau, H. D., F. Lemaitre, K. R. Garrod, Z. Garcia, A. M. Lennon-Dumenil and P. Bousso (2015). "Signal  
664 strength regulates antigen-mediated T-cell deceleration by distinct mechanisms to promote  
665 local exploration or arrest." Proc Natl Acad Sci U S A **112**(39): 12151-12156.
- 666 Mosier, D. E., R. J. Gulizia, S. M. Baird and D. B. Wilson (1988). "Transfer of a functional human immune  
667 system to mice with severe combined immunodeficiency." Nature **335**(6187): 256-259.
- 668 Mrass, P., J. Petravic, M. P. Davenport and W. Weninger (2010). "Cell-autonomous and environmental  
669 contributions to the interstitial migration of T cells." Semin Immunopathol **32**(3): 257-274.
- 670 Nakai, J., M. Ohkura and K. Imoto (2001). "A high signal-to-noise Ca<sup>2+</sup> probe composed of a single green  
671 fluorescent protein." Nat Biotechnol **19**(2): 137-141.
- 672 Negulescu, P. A., T. B. Krasieva, A. Khan, H. H. Kerschbaum and M. D. Cahalan (1996). "Polarity of T cell  
673 shape, motility, and sensitivity to antigen." Immunity **4**(5): 421-430.
- 674 Negulescu, P. A., N. Shastri and M. D. Cahalan (1994). "Intracellular calcium dependence of gene  
675 expression in single T lymphocytes." Proc Natl Acad Sci U S A **91**(7): 2873-2877.

- 676 Perez Koldenkova, V. and T. Nagai (2013). "Genetically encoded Ca<sup>2+</sup> indicators: properties and  
677 evaluation." Biochim Biophys Acta **1833**(7): 1787-1797.
- 678 Petrie, R. J., A. D. Doyle and K. M. Yamada (2009). "Random versus directionally persistent cell  
679 migration." Nat Rev Mol Cell Biol **10**(8): 538-549.
- 680 Prakriya, M., S. Feske, Y. Gwack, S. Srikanth, A. Rao and P. G. Hogan (2006). "Orai1 is an essential pore  
681 subunit of the CRAC channel." Nature **443**(7108): 230-233.
- 682 Romoser, V. A., P. M. Hinkle and A. Persechini (1997). "Detection in living cells of Ca<sup>2+</sup>-dependent  
683 changes in the fluorescence emission of an indicator composed of two green fluorescent protein  
684 variants linked by a calmodulin-binding sequence. A new class of fluorescent indicators." J Biol  
685 Chem **272**(20): 13270-13274.
- 686 Roos, J., P. J. DiGregorio, A. V. Yeromin, K. Ohlsen, M. Lioudyno, S. Zhang, O. Safrina, J. A. Kozak, S. L.  
687 Wagner, M. D. Cahalan, G. Velicelebi and K. A. Stauderman (2005). "STIM1, an essential and  
688 conserved component of store-operated Ca<sup>2+</sup> channel function." J Cell Biol **169**(3): 435-445.
- 689 Schaff, U. Y., N. Dixit, E. Procyk, I. Yamayoshi, T. Tse and S. I. Simon (2010). "Orai1 regulates intracellular  
690 calcium, arrest, and shape polarization during neutrophil recruitment in shear flow." Blood  
691 **115**(3): 657-666.
- 692 Shultz, L. D., P. A. Schweitzer, S. W. Christianson, B. Gott, I. B. Schweitzer, B. Tennent, S. McKenna, L.  
693 Mobraaten, T. V. Rajan, D. L. Greiner and et al. (1995). "Multiple defects in innate and adaptive  
694 immunologic function in NOD/LtSz-scid mice." J Immunol **154**(1): 180-191.
- 695 Svensson, L., A. McDowall, K. M. Giles, P. Stanley, S. Feske and N. Hogg (2010). "Calpain 2 controls  
696 turnover of LFA-1 adhesions on migrating T lymphocytes." PLoS One **5**(11): e15090.
- 697 Thestrup, T., J. Litzlbauer, I. Bartholomaeus, M. Mues, L. Russo, H. Dana, Y. Kovalchuk, Y. Liang, G.  
698 Kalamakis, Y. Laukat, S. Becker, G. Witte, A. Geiger, T. Allen, L. C. Rome, T. W. Chen, D. S. Kim, O.



699 Garaschuk, C. Griesinger and O. Griesbeck (2014). "Optimized ratiometric calcium sensors for  
700 functional in vivo imaging of neurons and T lymphocytes." Nat Methods.

701 Vaeth, M., J. Yang, M. Yamashita, I. Zee, M. Eckstein, C. Knosp, U. Kaufmann, P. Karoly Jani, R. S. Lacruz,  
702 V. Flockerzi, I. Kacs Kovics, M. Prakriya and S. Feske (2017). "ORAI2 modulates store-operated  
703 calcium entry and T cell-mediated immunity." Nat Commun **8**: 14714.

704 Vig, M., A. Beck, J. M. Billingsley, A. Lis, S. Parvez, C. Peinelt, D. L. Koomoa, J. Soboloff, D. L. Gill, A. Fleig,  
705 J. P. Kinet and R. Penner (2006). "CRACM1 multimers form the ion-selective pore of the CRAC  
706 channel." Curr Biol **16**(20): 2073-2079.

707 Wei, S. H., I. Parker, M. J. Miller and M. D. Cahalan (2003). "A stochastic view of lymphocyte motility and  
708 trafficking within the lymph node." Immunol Rev **195**: 136-159.

709 Wei SH, S. O., Yu Y, Garrod KR, Cahalan MD, Parker I. (2007). "Ca<sup>2+</sup> signals in CD4<sup>+</sup> T cells during early  
710 contacts with antigen-bearing dendritic cells in lymph node." J Immunol **179**(3): 1586-1594.

711 Woolf, E., I. Grigorova, A. Sagiv, V. Grabovsky, S. W. Feigelson, Z. Shulman, T. Hartmann, M. Sixt, J. G.  
712 Cyster and R. Alon (2007). "Lymph node chemokines promote sustained T lymphocyte motility  
713 without triggering stable integrin adhesiveness in the absence of shear forces." Nat Immunol  
714 **8**(10): 1076-1085.

715 Wu, M. M., E. D. Covington and R. S. Lewis (2014). "Single-molecule analysis of diffusion and trapping of  
716 STIM1 and Orai1 at endoplasmic reticulum-plasma membrane junctions." Mol Biol Cell **25**(22):  
717 3672-3685.

718 Yeromin, A. V., S. L. Zhang, W. Jiang, Y. Yu, O. Safrina and M. D. Cahalan (2006). "Molecular identification  
719 of the CRAC channel by altered ion selectivity in a mutant of Orai." Nature **443**(7108): 226-229.

720 Zhang SL, Y. A., Zhang XH, Yu Y, Safrina O, Penna A, Roos J, Stauderman KA, Cahalan MD. (2006).  
721 "Genome-wide RNAi screen of Ca<sup>2+</sup> influx identifies genes that regulate Ca<sup>2+</sup> release-activated  
722 Ca<sup>2+</sup> channel activity." Proc Natl Acad Sci USA **103**(24): 9357-9362.

723 Zhang, S. L., Y. Yu, J. Roos, J. A. Kozak, T. J. Deerinck, M. H. Ellisman, K. A. Stauderman and M. D. Cahalan  
724 (2005). "STIM1 is a Ca<sup>2+</sup> sensor that activates CRAC channels and migrates from the Ca<sup>2+</sup> store to  
725 the plasma membrane." Nature **437**(7060): 902-905.

726 Zhao, Y., S. Araki, J. Wu, T. Teramoto, Y. F. Chang, M. Nakano, A. S. Abdelfattah, M. Fujiwara, T. Ishihara,  
727 T. Nagai and R. E. Campbell (2011). "An expanded palette of genetically encoded Ca<sup>2+</sup>  
728 indicators." Science **333**(6051): 1888-1891.

729

## 730 **Figure Legends**

731 **Figure 1.** Effects of expressing Orai1-E106A on human T cell function. **(A)** Averaged  
732 thapsigargin-induced  $\text{Ca}^{2+}$  entry, measured by fura-2, in activated human  $\text{CD4}^+$  T cells  
733 transfected with eGFP-Orai1-E106A (left) or empty vector control (EV, right,  $n = 133$   
734 cells); eGFP-E106A transfected cells were grouped into two populations, either eGFP-  
735 E106A<sup>hi</sup> with high eGFP fluorescence (solid squares,  $n = 43$  cells) or eGFP-E106A<sup>lo</sup> with  
736 no detectable eGFP fluorescence (empty squares,  $n = 115$  cells); bars represent SEM,  
737 data representative of at least three different experiments. **(B)** Human  $\text{CD3}^+$  T cells  
738 transfected with eGFP for control and expression level was measured at 24 hr post-  
739 transfection before adoptive transfer into reconstituted NOD.SCI. $\beta$ 2 mice; cells were  
740 recovered from lymph nodes 18 hr later and eGFP fluorescence was used to measure  
741 homing to lymph nodes. **(C,D)** Human  $\text{CD3}^+$  T cells were transfected with eGFP-E106A  
742 and expression level was measured before adoptive transfer into reconstituted  
743 NOD.SCI. $\beta$ 2 mice either 24 hr **(C)** or 3 hr **(D)** post-transfection; cells were recovered from  
744 lymph nodes 18 hr later and eGFP fluorescence was used to measure homing to lymph  
745 nodes; data representative of independent experiments from 12 different donors.

746  
747 **Figure 2.** Orai1 block increases human T cell motility within reconstituted NOD.SCID. $\beta$ 2  
748 lymph nodes. **(A)** Two-photon microscopy of migrating human T cells, showing eGFP-  
749 E106A transfected cells in green and CMTMR-labeled mock transfected cells in red,  
750 within intact mouse lymph node 18 hours after adoptive co-transfer of  $5 \times 10^6$  of each cell  
751 type. **(B)** Average cell velocities of eGFP-E106A<sup>hi</sup> ( $n = 50$ ) versus CMTMR-labeled control  
752 ( $n = 71$ ) T cells; bars represent mean  $\pm$  SEM, data from independent experiments using

753 4 different donors. **(C)** Maximum and minimum cellular instantaneous velocities of eGFP-  
754 E106A<sup>hi</sup> (green) versus CMTMR-labeled (red) control T cells. **(D)** Arrest coefficients of  
755 eGFP-E106A<sup>hi</sup> compared with CMTMR-labeled control T cells, defined as fraction of time  
756 with instantaneous velocity < 2  $\mu\text{m}/\text{min}$ . **(E)** Frequency distribution of average cell  
757 velocities for eGFP-E106A<sup>hi</sup> (top) and CMTMR-labeled control T cells (bottom), cells with  
758 average velocity < 7  $\mu\text{m}/\text{min}$  are highlighted in gray; tick marks denote the center of every  
759 other bin. **(F,G)** Average cell velocities **(F)** and arrest coefficients **(G)** of eGFP-E106A<sup>hi</sup>  
760 (green, n = 102) versus CMTMR-labeled control (red, n = 278) human T cells in NK cell  
761 depleted immunodeficient mouse lymph nodes; bars represent mean  $\pm$  SEM, data from  
762 independent experiments using 8 different donors, \*\*\* = p < 0.005.

763

764 **Figure 3.** Orai1 block reduces frequency of pausing during human T cell motility *in vitro*.  
765 **(A,B)** Confocal microscopy of eGFP-E106A transfected human CD4<sup>+</sup> T cells in  
766 microfabricated channels 7  $\mu\text{m}$  high by 8  $\mu\text{m}$  wide, showing two individual eGFP-E106A<sup>hi</sup>  
767 T cells **(A)** and two eGFP-E106A<sup>lo</sup> T cells **(B)**, each circled in red in the first frame;  
768 individual images taken 1 min apart, scale bar = 10  $\mu\text{m}$ . **(C)** Comparison of average cell  
769 velocities of eGFP-E106A transfected T cells (eGFP-E106A<sup>hi</sup> cells in green, n = 102;  
770 eGFP-E106A<sup>lo</sup> cells in gray, n = 131) vs eGFP-Orai1 transfected control T cells (eGFP-  
771 Orai1<sup>hi</sup> cells in green, n = 43; eGFP-Orai1<sup>lo</sup> cells in gray, n = 76); bars represent mean  $\pm$   
772 SEM, data from independent experiments using 5 different donors. **(D)** Frequency  
773 distribution of average cell velocities of eGFP-E106A<sup>hi</sup> (top) and eGFP-E106A<sup>lo</sup> (bottom)  
774 human T cells, cells with average velocity < 7  $\mu\text{m}/\text{min}$  are highlighted in gray; tick marks  
775 denote the center of every other bin. **(E)** Arrest coefficients of eGFP-E106A<sup>hi</sup> vs eGFP-

776 E106A<sup>lo</sup> human T cells, defined as fraction of time each individual cell had an  
777 instantaneous velocity < 2  $\mu\text{m}/\text{min}$ . **(F)** Variance in velocity of eGFP-E106A<sup>hi</sup> vs eGFP-  
778 E106A<sup>lo</sup> human T cells, coefficient of variation is calculated by standard deviation divided  
779 by the mean of instantaneous velocity for each individual cell. **(G)** Duration of pauses for  
780 eGFP-E106A<sup>hi</sup> vs eGFP-E106A<sup>lo</sup> human T cells; bars represent mean  $\pm$  SEM, \* =  $p <$   
781 0.05, \*\* =  $p < 0.01$ , \*\*\* =  $p < 0.005$ , \*\*\*\* =  $p < 0.001$ .

782

783 **Figure 4.** Design of novel tdTomato-V5-GCaMP6f fusion probe “Salsa6f” and  
784 characterization in living cells. **(A)** Several genetically encoded Ca<sup>2+</sup> indicators were  
785 screened *in vitro* in HEK 293A cells, by co-transfecting with Orai1/STIM1 and measuring  
786 Ca<sup>2+</sup> influx after thapsigargin-induced store depletion, showing maximum change in  
787 fluorescence intensity in dark green bars and dynamic range (DR) in light green bars, with  
788 Salsa6f shown in orange bars on right;  $n > 30$  cells per probe, from two different  
789 transfections, error bars indicate SEM. **(B)** Averaged thapsigargin-induced Ca<sup>2+</sup> entry,  
790 measured by change in GFP fluorescence, in GCaMP6f (green,  $11.52 \pm 0.34$ ,  $n = 63$ ) or  
791 Salsa6f (orange,  $10.16 \pm 0.31$ ,  $n = 78$ ) transfected HEK cells; data from two different  
792 transfections, error bars indicate SEM. **(C)** Diagram of Salsa6f construct used in  
793 transfection. **(D)** Two-photon images of Salsa6f co-transfected in HEK cells with  
794 Orai1/STIM1, showing red (tdTomato), green (GCaMP6f), and merged channels, at  
795 baseline in 0 mM extracellular Ca<sup>2+</sup> and after maximum stimulation with 2  $\mu\text{M}$  ionomycin  
796 in 2 mM extracellular Ca<sup>2+</sup>; scale bar = 20  $\mu\text{m}$ ; see **Video 1**; data representative of at least  
797 three different experiments. **(E)** Confocal time lapse microscopy of human CD4<sup>+</sup> T cells  
798 transfected with Salsa6f, then activated for two days on platebound anti-CD3/28

799 antibodies; time = min:sec, scale bar = 10  $\mu\text{m}$ . (F) Representative cell traces of activated  
800 Salsa6f transfected human T cells, tracking green fluorescence intensity; data  
801 representative of at least three different experiments.

802

803 **Figure 5.** Tracking  $\text{Ca}^{2+}$  signals in human T cells *in vitro* with Salsa6f. (A,C) Confocal  
804 microscopy of Salsa6f transfected human  $\text{CD4}^+$  T cells in ICAM-1 coated microchannels  
805 7  $\mu\text{m}$  high by 8  $\mu\text{m}$  wide (A) and open space (C), showing merged red (tdTomato), green  
806 (GCaMP6f), and DIC channels; circular structures shown in (C) are support pillars part of  
807 the PDMS chamber; scale bar = 10  $\mu\text{m}$ , time = sec; see **Videos 2 and 3**. (B,D) Total  
808 intensity tracings of GCaMP6f (green) and tdTomato (red) fluorescence,  
809 GCaMP6f/tdTomato ratio (orange), and speed (black), for corresponding T cells shown  
810 in (A) and (C); data representative of independent experiments from three different  
811 donors.

812

813 **Figure 6.** Spontaneous  $\text{Ca}^{2+}$  signals during human T cell motility *in vitro* are correlated  
814 with reduced velocity. (A,B) Sample tracks from Salsa6f transfected human T cells in  
815 microchannels, with intracellular  $\text{Ca}^{2+}$  levels measured by  $R/R_0$  of GCaMP6f over  
816 tdTomato fluorescence intensity (orange), overlaid with instantaneous cell velocity  
817 (black), cells in (A) have stable  $\text{Ca}^{2+}$  levels, cells in (B) show brief  $\text{Ca}^{2+}$  transients  
818 (arrowheads) or sustained  $\text{Ca}^{2+}$  signaling (gray highlights). (C) Instantaneous velocity of  
819 Salsa6f transfected human T cells in microchannels during elevated cytosolic  $\text{Ca}^{2+}$  levels  
820 (red) and during basal  $\text{Ca}^{2+}$  levels (green);  $n = 22$  cells, data from independent  
821 experiments using three different donors; \*\*\*\* =  $p < 0.001$ . (D) Scatter plot of Salsa

822 transfected human T cells in microchannels, instantaneous cell velocity versus  
823 GCaMP6f/tdTomato R/R<sub>0</sub> for each individual time point analyzed; red numbers in each  
824 quadrant show percent of time points, split by 1.10 R/R<sub>0</sub> and 10 μm/min; n = 4081 points.  
825 **(E)** Mean track velocity of eGFP-E106A transfected human T cells, comparing eGFP-  
826 E106A<sup>hi</sup> (green) versus eGFP-E106A<sup>lo</sup> T cells (gray) in confined microchannels vs open  
827 space; n = 30, 44, 33, and 62 cells, respectively; bars represent mean ± SEM, data from  
828 independent experiments using two different donors, \* = p < 0.05, \*\* = p < 0.01. **(F)** Scatter  
829 plot of Salsa transfected human T cells in open space, instantaneous cell velocity versus  
830 GCaMP6f/tdTomato R/R<sub>0</sub> for each individual time point analyzed; red numbers in each  
831 quadrant show percent of cells, split by 1.10 R/R<sub>0</sub> and 10 μm/min; n = 723 points.  
832

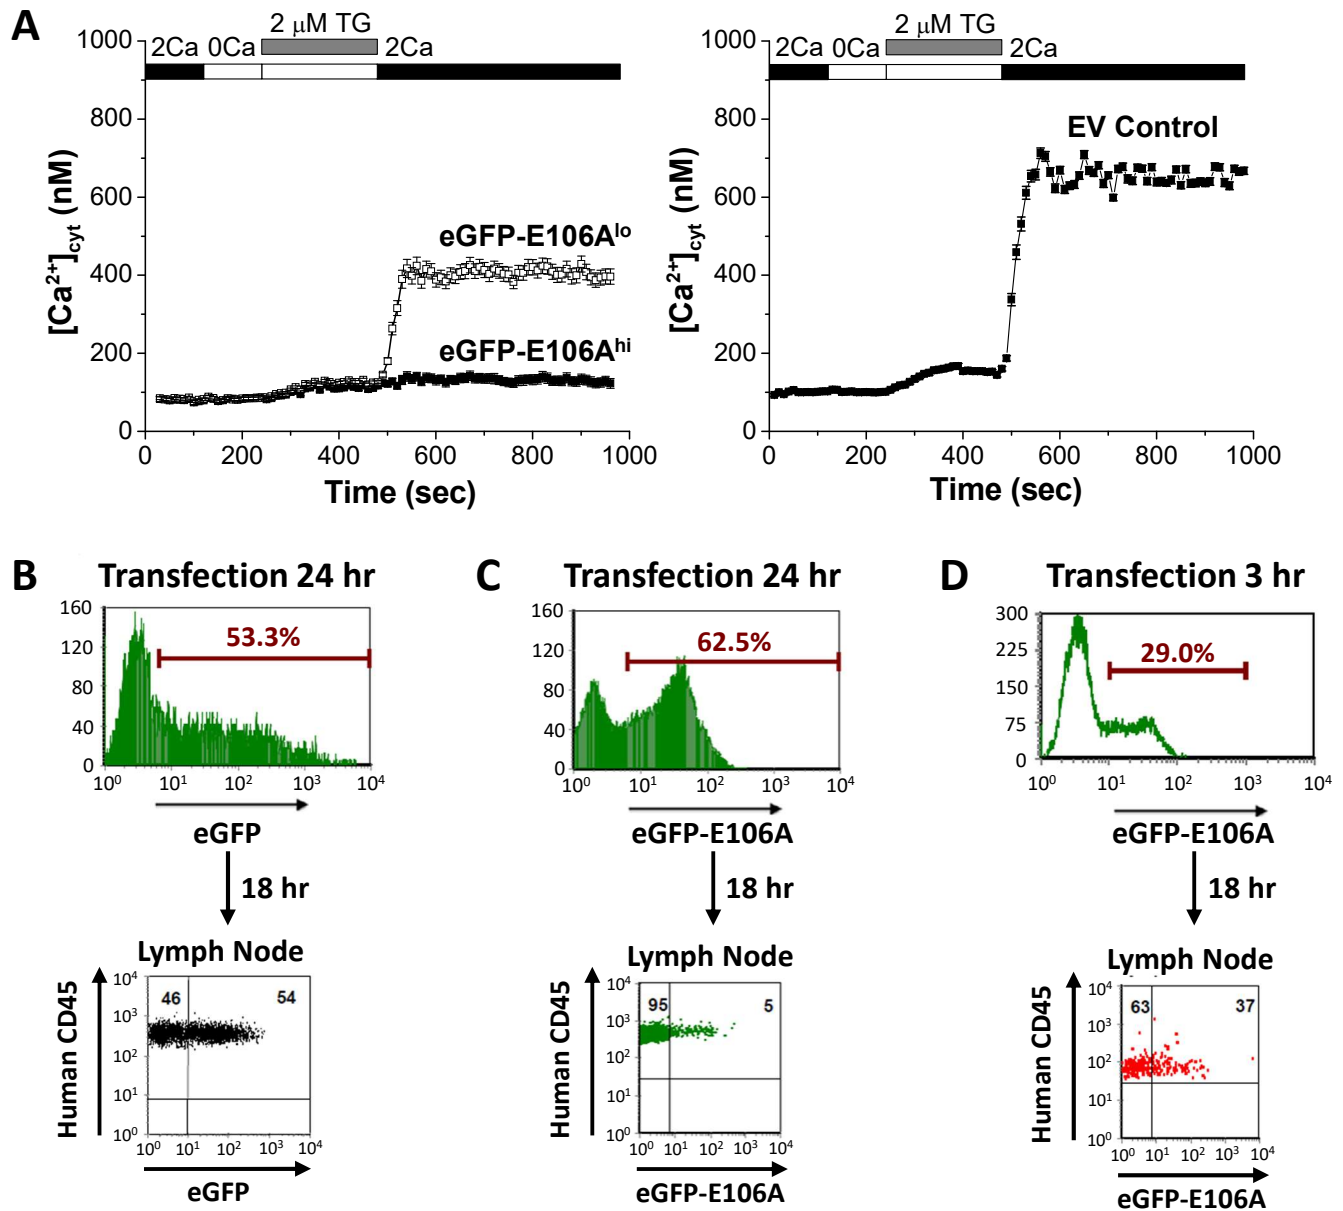

Figure 1



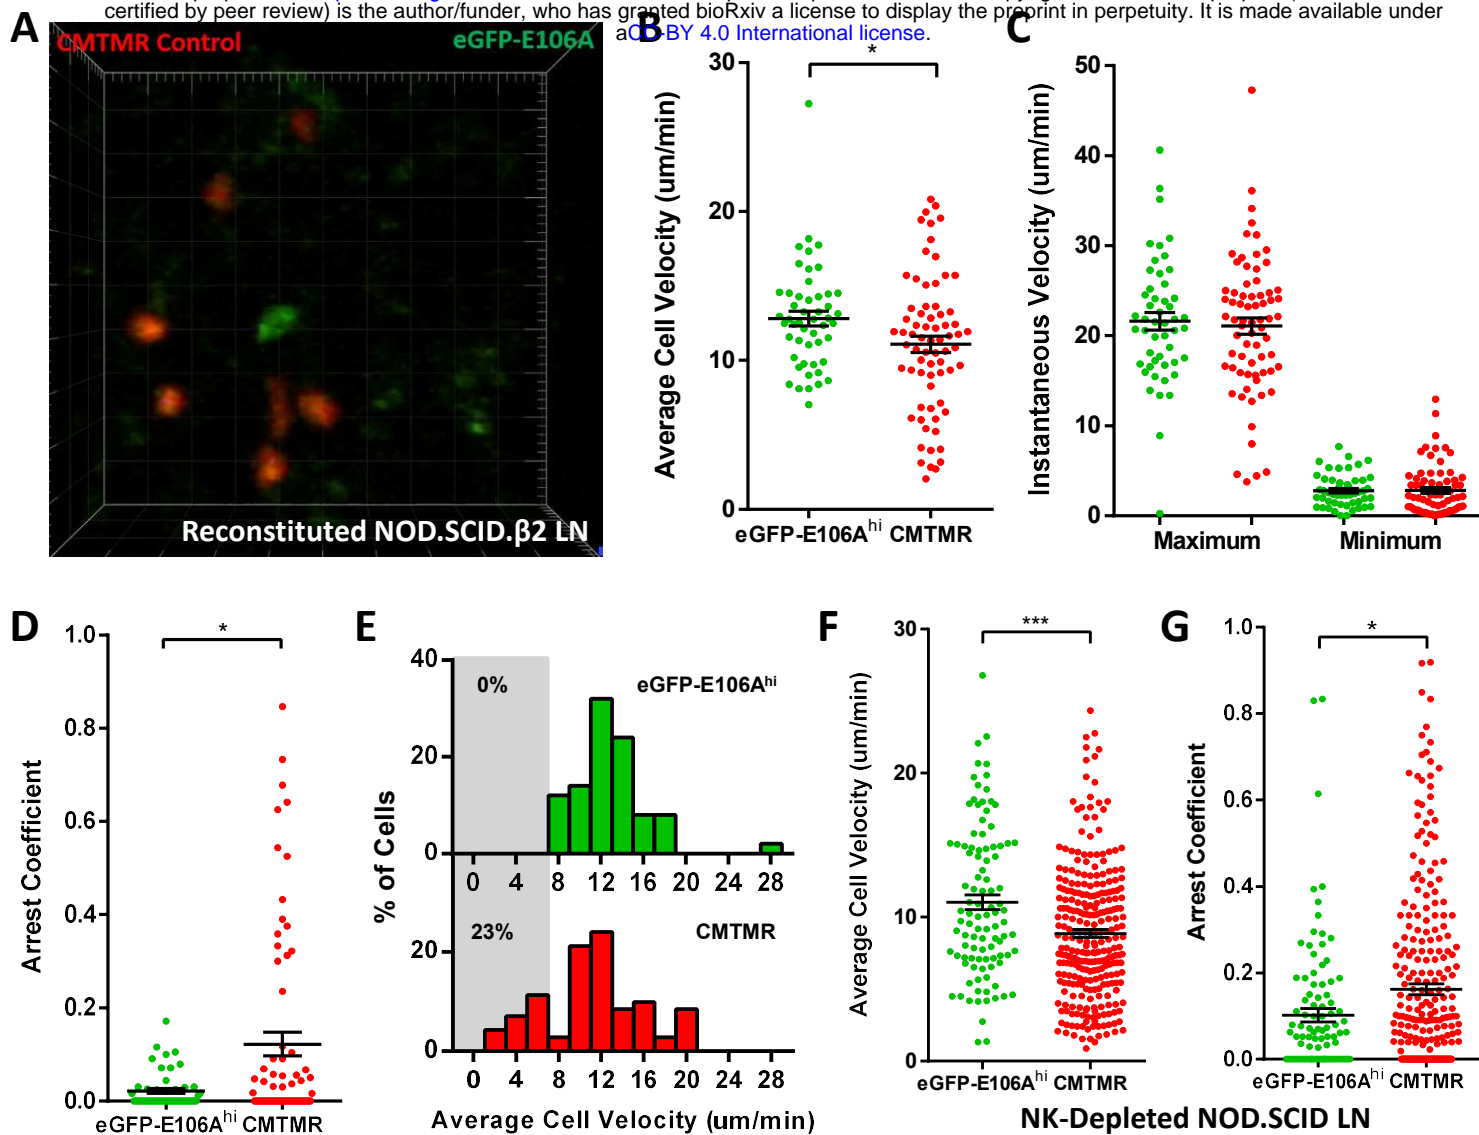

**Figure 2**

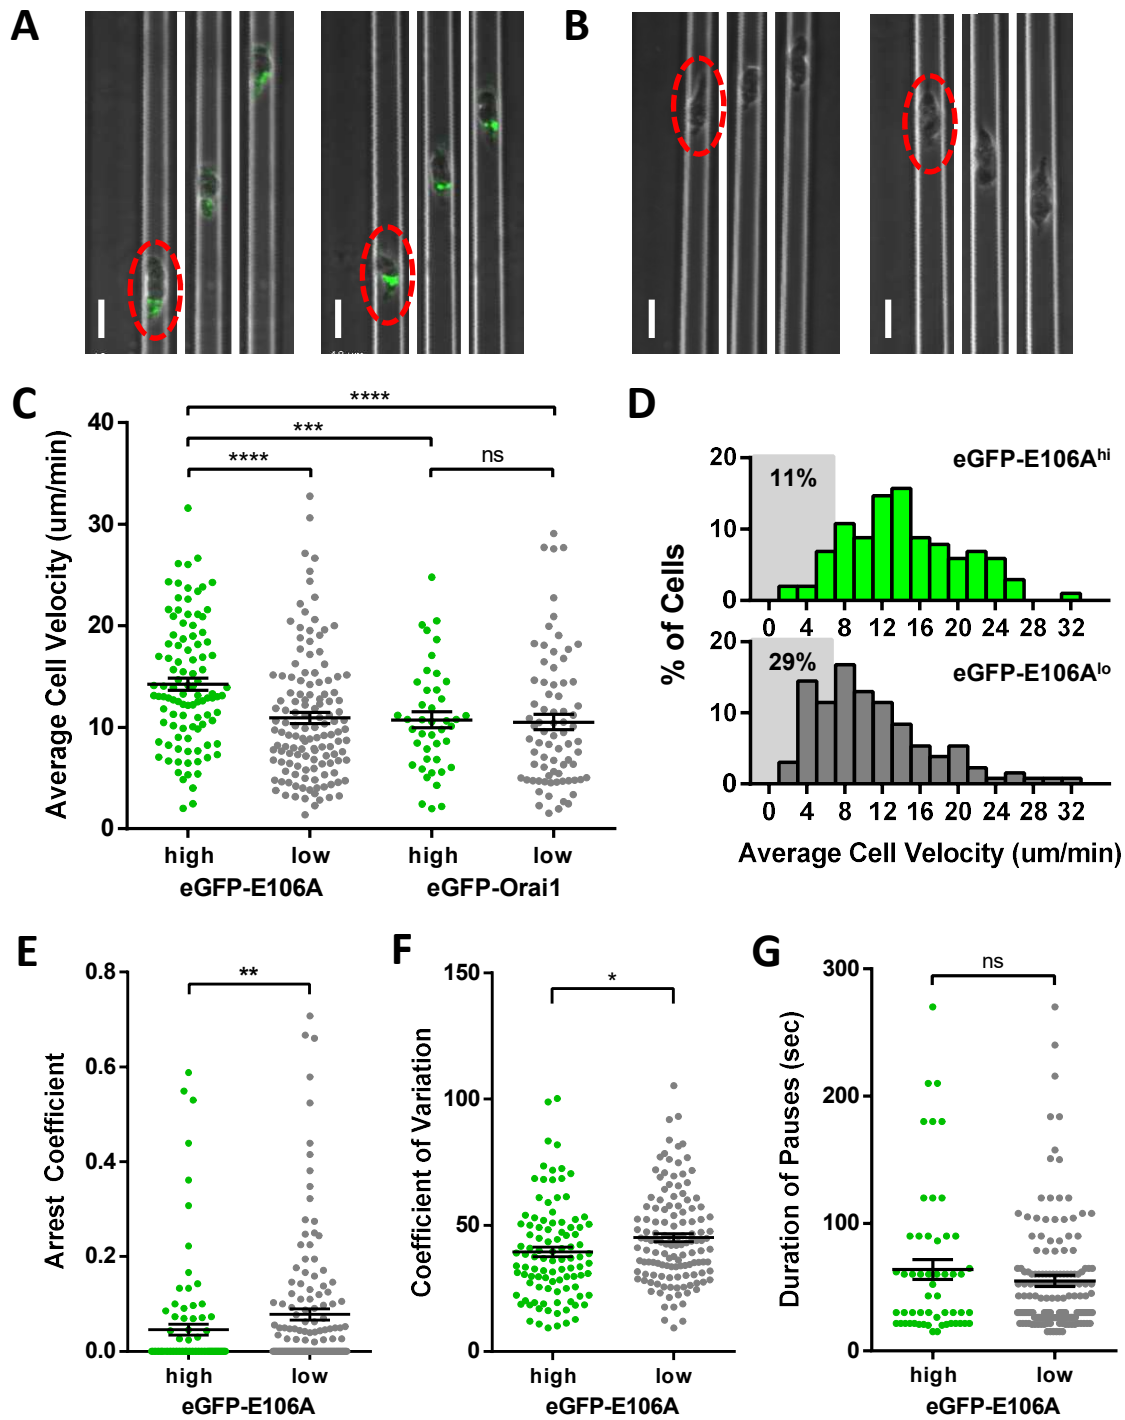

**Figure 3**

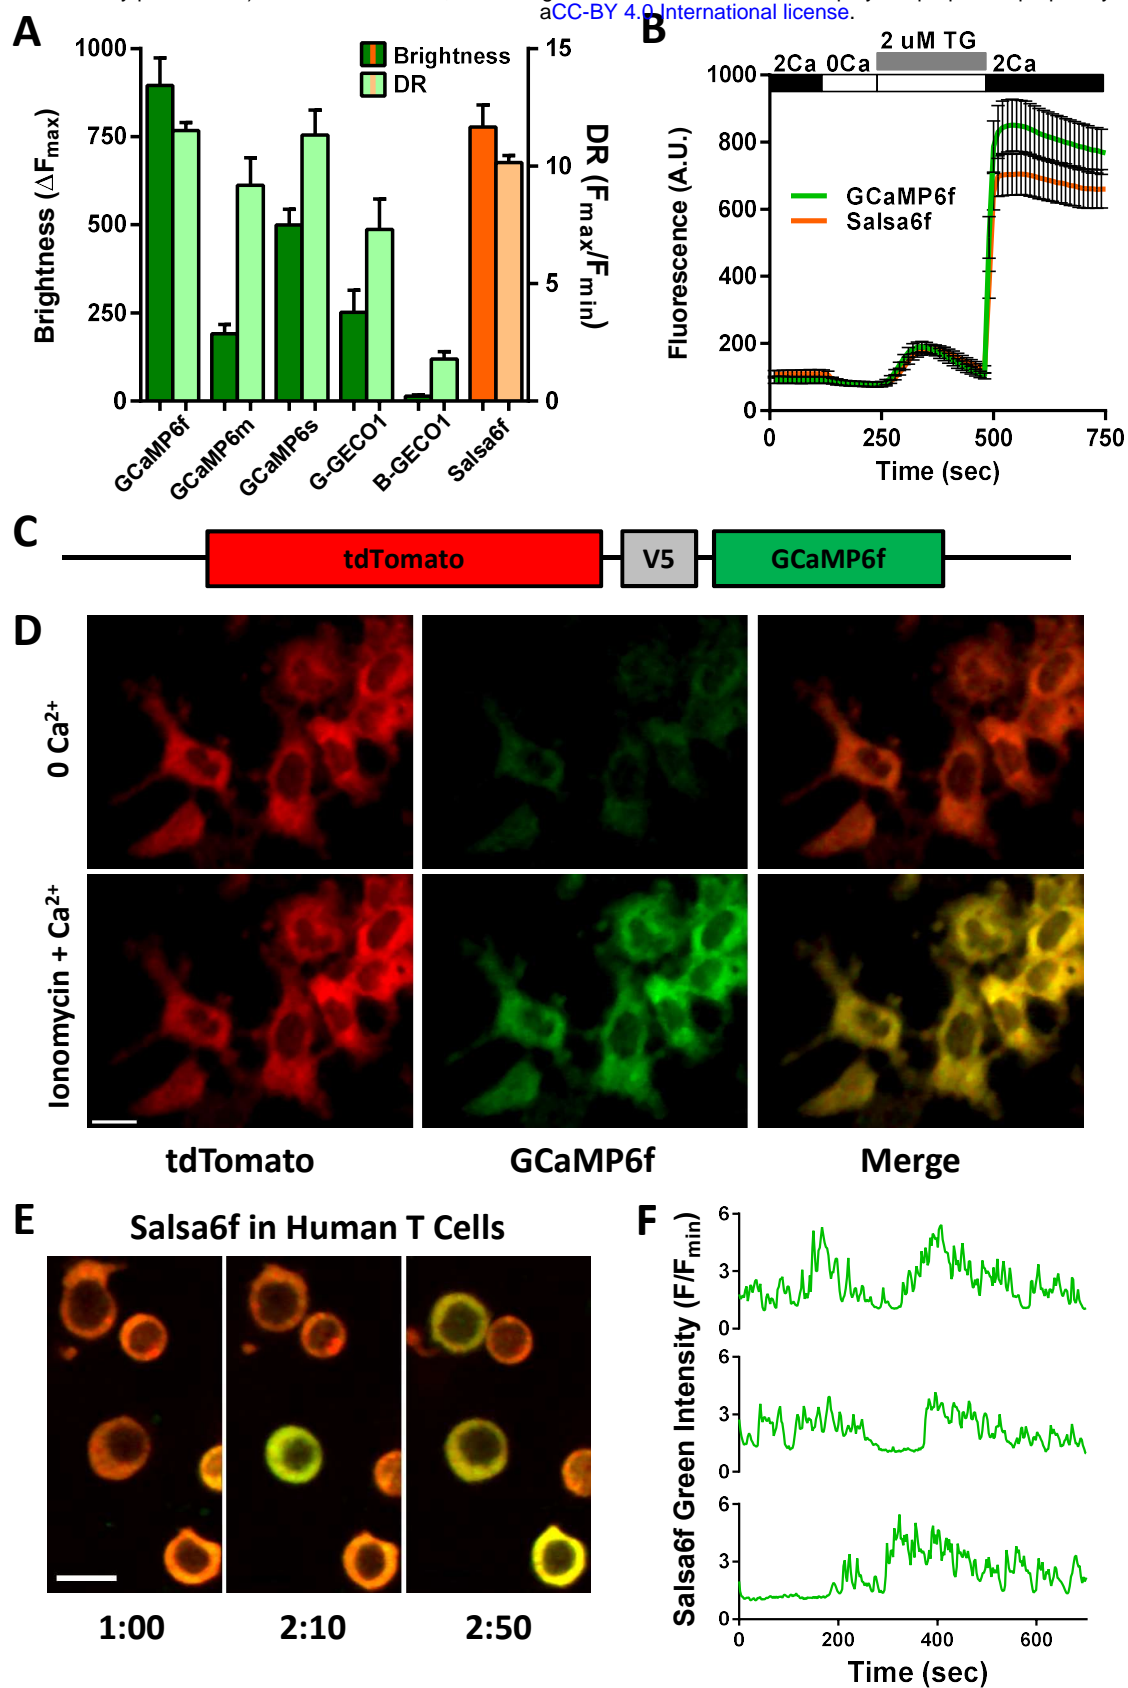

**Figure 4**

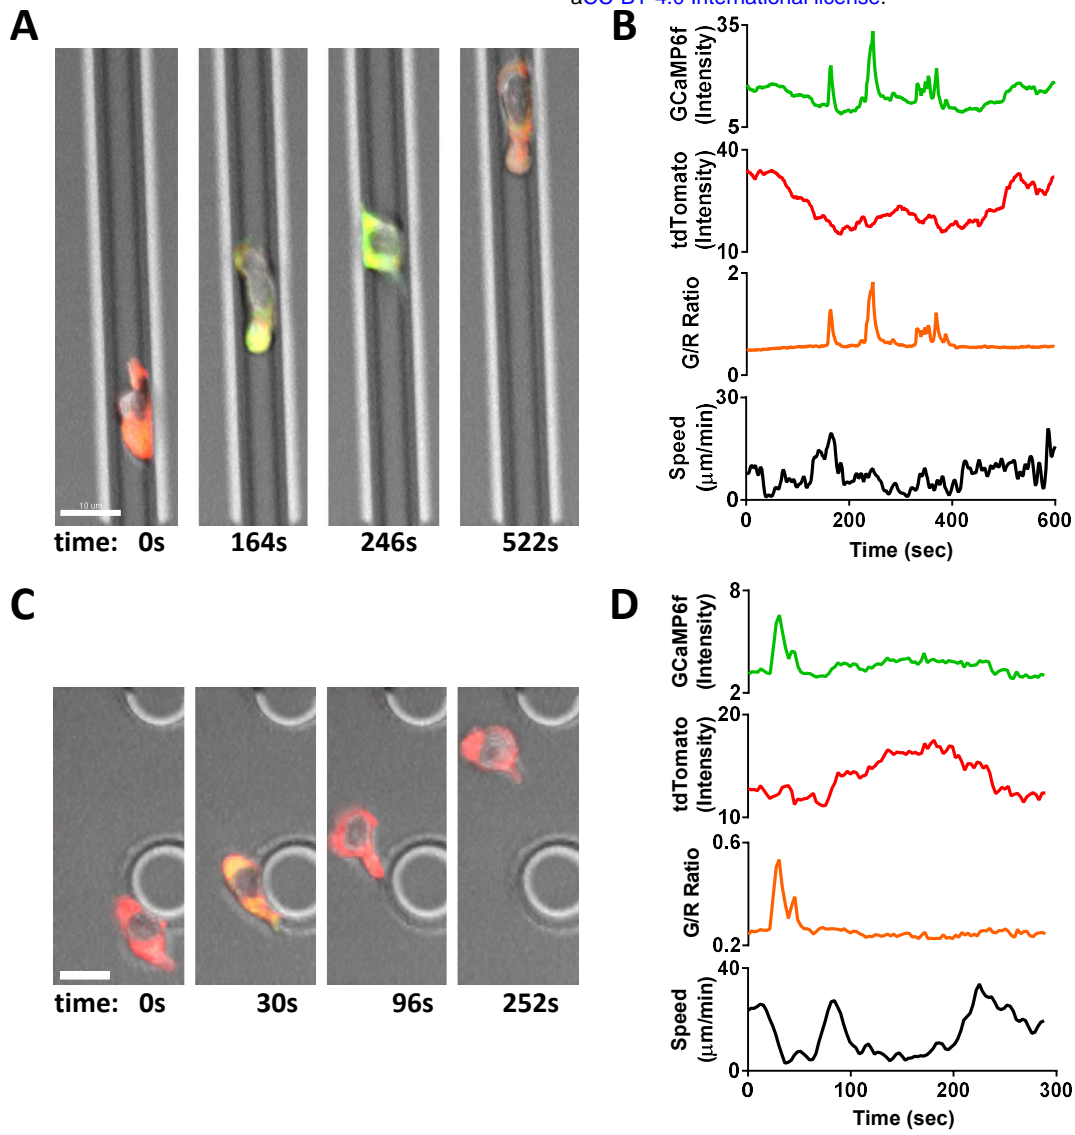

**Figure 5**

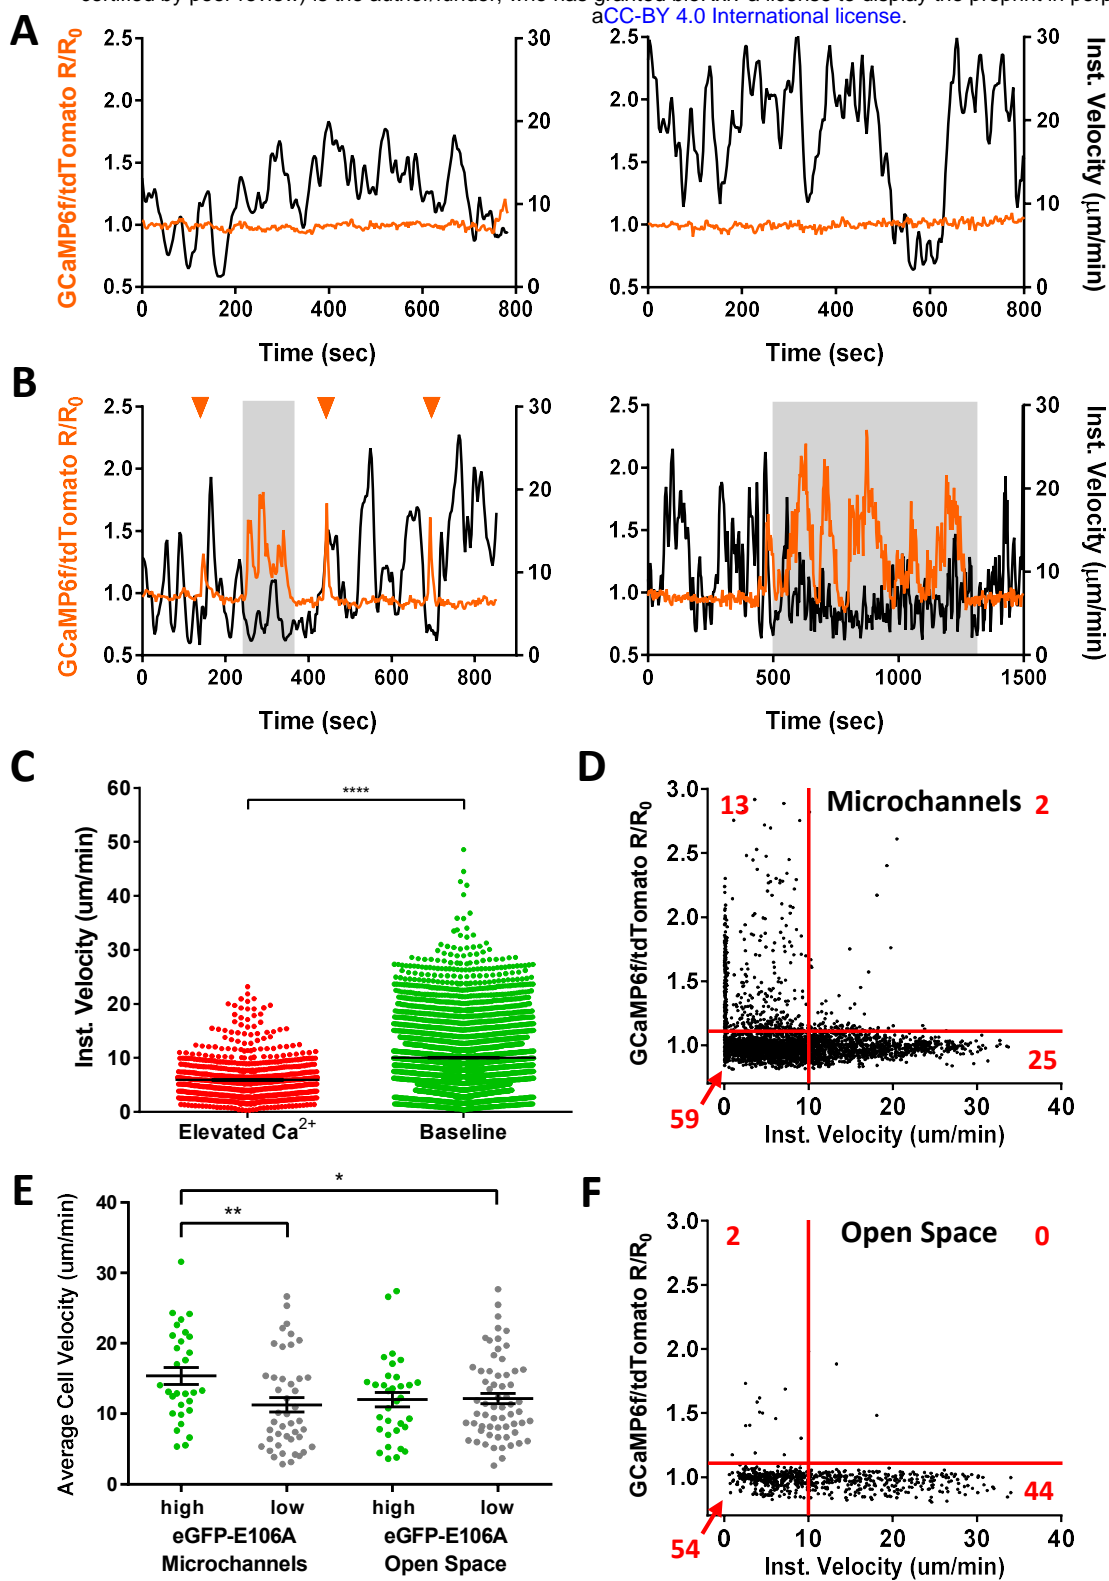

**Figure 6**

## Supplementary Information

**Supplementary Figure 1.** Validation of dominant-negative eGFP-Orai1-E106A to assess activation, homing, and motility of human T cells. **(A)** Primary human CD4<sup>+</sup> and CD8<sup>+</sup> T cells were transfected with eGFP-E106A, then uniformly labeled with the fluorescent cell tracker dye CMTMR and co-cultured with SEB-pulsed primary human dendritic cells from the same donor; proliferation was assessed after 72 hr by CMTMR dilution as measured by flow cytometry. **(B)** Protocol for homing and two-photon imaging of transfected human CD3<sup>+</sup> T cells in reconstituted NOD.SCID.β2 mouse lymph node.

**Video 1.** HEK 293A cells transfected with Salsa6f, first washed with 0 mM Ca<sup>2+</sup> followed by 2 μM ionomycin in 2 mM Ca<sup>2+</sup>; scale bar = 20 μm, time shown in hr:min:sec.

**Video 2.** Salsa6f transfected human T cell in confined microchannel, with merged red (tdTomato), green (GCaMP6f), and DIC channels; scale bar = 10 μm, time shown in hr:min:sec.

**Video 3.** Salsa6f transfected human T cells in open microchamber, with merged red (tdTomato), green (GCaMP6f), and DIC channels, circular structures are support pillars part of the PDMS microchamber; scale bar = 10 μm, time shown in hr:min:sec.

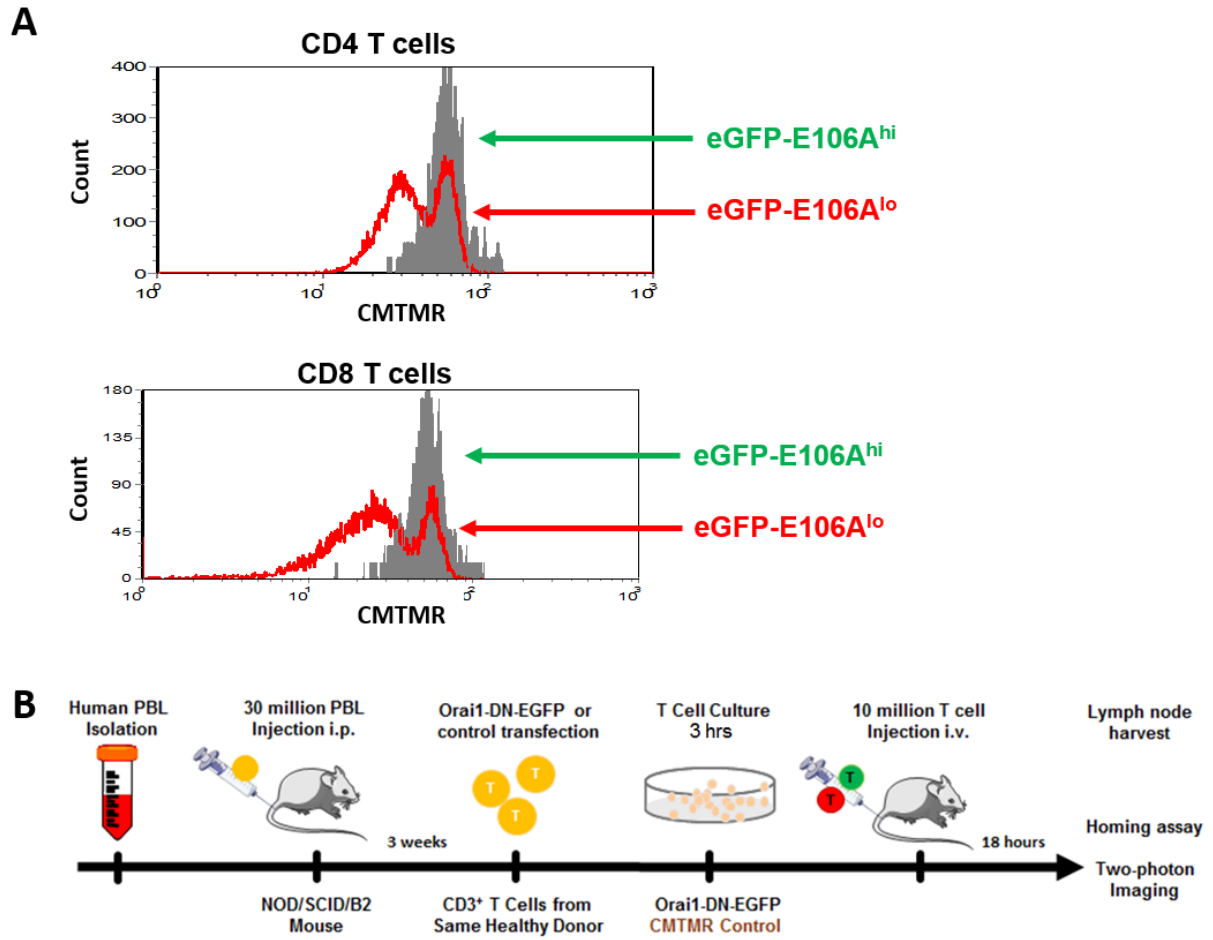

## Supplementary Figure 1
